# Supplementary material
Source: Royal Society of Chemistry journal article supplement (doi:10.1039/d6cp00743k)
Supplement: d6cp00743k1.pdf [file d6cp00743k1.pdf]

Revised SI prepared for *Phys. Chem. Chem. Phys.*

## **Unifying Path-Dependent and Thermodynamic Descriptors of Asynchronicity in Double Proton Transfer reactions**

Sebastián Richter <sup>a,b</sup>, Máximo Venegas <sup>a,b</sup>, Pablo Jaque <sup>a,b\*</sup>

<sup>a</sup> Departamento de Química Orgánica y Fisicoquímica, Facultad de Ciencias Químicas y Farmacéuticas, Universidad de Chile, Olivos 1007, Independencia, Santiago, Chile

<sup>b</sup> Centro de Modelamiento Molecular, Biofísica y Bioinformática, CM2B2, Universidad de Chile, Sergio Livingstone 1007, Independencia, Santiago, Chile

### **Supporting information content**

|                                           |           |
|-------------------------------------------|-----------|
| <i>Supplementary tables</i> .....         | <b>2</b>  |
| <i>Supplementary Figures</i> .....        | <b>10</b> |
| <i>Transition state coordinates</i> ..... | <b>16</b> |

## Supplementary tables

**Table S1.** Electronic proton affinities in the gas phase for the monomer species involved in double proton transfer (DPT): neutral monomer ( $\alpha - H_a$  or  $\beta - H_b$ ), cationic intermediate ( ${}^+ \alpha - H_a H_b$  or  $H_a H_b - \beta^+$ ), and anionic intermediate ( $\alpha^-$  or  $\beta^-$ ). Two proton affinities are reported:  $PA_{\alpha - H_a(\beta - H_b)}$ , corresponding to protonation of the neutral monomer to form the cationic intermediate, and  $PA_{\alpha^-(\beta^-)}$ , corresponding to protonation of the anionic intermediate to regenerate the neutral monomer. Proton affinities were computed from electronic energies in the gas phase.

|          | <i>Neutral monomer</i><br>( $\alpha - H_a$<br>or $\beta - H_b$ ) | <i>Cationic intermediate</i><br>( ${}^+ \alpha - H_a H_b$ or<br>$H_a H_b - \beta^+$ ) | <i>Anionic intermediate</i><br>( $\alpha^-$ or $\beta^-$ ) | $PA_{\alpha - H_a(\beta - H_b)}$ | $PA_{\alpha^-(\beta^-)}$ |
|----------|------------------------------------------------------------------|---------------------------------------------------------------------------------------|------------------------------------------------------------|----------------------------------|--------------------------|
|          | (Hartree)                                                        | (Hartree)                                                                             | (Hartree)                                                  | (kcal/mol)                       | (kcal/mol)               |
| <b>A</b> | -477.2894628                                                     | -477.6498161                                                                          | -476.7318543                                               | 226.123                          | 349.90                   |
| <b>B</b> | -323.6135986                                                     | -323.9672292                                                                          | -323.0489337                                               | 221.904                          | 354.33                   |
| <b>C</b> | -205.7700503                                                     | -206.0018676                                                                          | -205.2249844                                               | 145.466                          | 342.03                   |
| <b>D</b> | -76.45853198                                                     | -76.72951226                                                                          | -75.82744793                                               | 170.041                          | 396.01                   |
| <b>E</b> | -399.4226462                                                     | -399.6521224                                                                          | -398.8589548                                               | 143.997                          | 353.72                   |
| <b>F</b> | -189.8277702                                                     | -190.1111193                                                                          | -189.2727986                                               | 177.802                          | 348.25                   |
| <b>G</b> | -512.776132                                                      | -513.0776877                                                                          | -512.2436936                                               | 189.227                          | 334.11                   |
| <b>H</b> | -835.736388                                                      | -836.051201                                                                           | -835.2118041                                               | 197.546                          | 329.18                   |
| <b>I</b> | -512.7796071                                                     | -513.0808314                                                                          | -512.2436945                                               | 189.019                          | 336.29                   |
| <b>J</b> | -229.164828                                                      | -229.4665567                                                                          | -228.6024864                                               | 189.336                          | 352.87                   |
| <b>K</b> | -150.0600165                                                     | -150.4350226                                                                          | -149.4550384                                               | 235.317                          | 379.63                   |
| <b>L</b> | -169.9548487                                                     | -170.2759687                                                                          | -169.3644449                                               | 201.504                          | 370.48                   |
| <b>M</b> | -379.9620789                                                     | -380.3330371                                                                          | -379.3933567                                               | 232.777                          | 356.87                   |
| <b>N</b> | -226.2659907                                                     | -226.618653                                                                           | -225.6880431                                               | 221.297                          | 362.66                   |

**Table S2.** Concerted DPT reaction set constructed from monomers A–N, covering all analyzed monomer-pair combinations. The table reports, for each reaction, the hydrogen-bond complexation energy ( $\Delta E_{HB}$ ), the thermodynamic driving force ( $\Delta E^0$ ), activation barrier ( $\Delta E^\ddagger$ ), barrier width ( $\Delta \xi_{TS}$ ), and the thermodynamic asynchronicity descriptor ( $\eta$ ).

| <b>Reaction</b> | $\Delta E_{HB}$<br>(kcal/mol) | $\Delta E^0$<br>(kcal/mol) | $\Delta E^\ddagger$<br>(kcal/mol) | $\Delta \xi_{TS}$<br>(amu <sup>1/2</sup> · bohr) | $\eta$<br>(kcal/mol) |
|-----------------|-------------------------------|----------------------------|-----------------------------------|--------------------------------------------------|----------------------|
| <b>AA</b>       | -14.6                         | 1.3                        | 7.4                               | 0.63                                             | 0.0                  |
| <b>AB</b>       | -15.3                         | -2.0                       | 6.0                               | 0.57                                             | 0.2                  |
| <b>AD</b>       | -9.7                          | 2.1                        | 14.9                              | 0.77                                             | -10.0                |
| <b>AJ</b>       | -18.9                         | -6.2                       | 8.8                               | 1.11                                             | -33.8                |
| <b>AK</b>       | -13.8                         | 0.7                        | 7.1                               | 2.07                                             | 38.9                 |
| <b>AL</b>       | -11.7                         | 9.8                        | 13.8                              | 0.75                                             | -4.0                 |
| <b>AM</b>       | -13.1                         | 7.0                        | 11.3                              | 1.13                                             | 13.6                 |
| <b>AN</b>       | -13.0                         | 0.6                        | 10.8                              | 0.72                                             | 7.9                  |
| <b>BB</b>       | -15.9                         | -5.3                       | 4.8                               | 0.63                                             | 0.0                  |
| <b>BD</b>       | -10.2                         | -2.1                       | 13.4                              | 0.77                                             | -10.2                |
| <b>BE</b>       | -4.0                          | -2.3                       | 8.6                               | 3.35                                             | -78.5                |
| <b>BF</b>       | -15.9                         | -3.0                       | 2.8                               | 1.41                                             | -50.2                |
| <b>BI</b>       | -9.4                          | -5.8                       | 2.1                               | 3.02                                             | -50.9                |
| <b>BJ</b>       | -15.8                         | -2.8                       | 3.9                               | 1.11                                             | -34.0                |
| <b>BK</b>       | -14.5                         | -2.8                       | 5.6                               | 1.76                                             | 38.7                 |
| <b>BL</b>       | -12.4                         | 6.5                        | 12.1                              | 0.74                                             | -4.2                 |
| <b>BM</b>       | -13.9                         | 3.8                        | 9.7                               | 1.09                                             | 13.4                 |
| <b>BN</b>       | -13.7                         | -3.1                       | 9.3                               | 0.77                                             | 7.7                  |
| <b>CC</b>       | -4.4                          | 0.0                        | 16.2                              | 0.65                                             | 0.0                  |
| <b>CD</b>       | -8.2                          | 0.0                        | 17.2                              | 0.96                                             | 78.6                 |
| <b>CE</b>       | -3.6                          | 0.0                        | 27.5                              | 0.94                                             | 10.2                 |
| <b>CF</b>       | -9.5                          | 0.0                        | 9.9                               | 0.80                                             | 38.6                 |
| <b>CG</b>       | -7.3                          | -1.9                       | 12.5                              | 0.93                                             | 35.8                 |
| <b>CH</b>       | -5.3                          | 0.0                        | 16.8                              | 1.03                                             | 39.2                 |
| <b>CI</b>       | -7.1                          | 1.9                        | 14.4                              | 0.93                                             | 37.8                 |
| <b>CJ</b>       | -10.4                         | 0.0                        | 8.6                               | 1.03                                             | 54.7                 |
| <b>CL</b>       | -11.0                         | 11.1                       | 13.4                              | 1.94                                             | 84.5                 |
| <b>DD</b>       | -4.2                          | 0.0                        | 46.5                              | 1.01                                             | 0.0                  |
| <b>DE</b>       | -2.9                          | 0.0                        | 40.6                              | 1.81                                             | -68.3                |
| <b>DF</b>       | -10.3                         | 0.0                        | 14.8                              | 0.84                                             | -40.0                |
| <b>DG</b>       | -10.4                         | 1.2                        | 13.2                              | 1.06                                             | -42.7                |
| <b>DH</b>       | -6.7                          | 0.0                        | 11.3                              | 1.21                                             | -39.3                |
| <b>DI</b>       | -7.1                          | -1.2                       | 12.1                              | 1.06                                             | -40.7                |

|           |       |       |      |      |       |
|-----------|-------|-------|------|------|-------|
| <b>DJ</b> | -10.3 | 0.0   | 14.4 | 0.73 | -23.8 |
| <b>DK</b> | -10.7 | 0.0   | 17.2 | 1.29 | 48.9  |
| <b>DL</b> | -9.4  | 11.0  | 22.6 | 0.77 | 5.9   |
| <b>DM</b> | -10.4 | 9.4   | 23.2 | 0.97 | 23.6  |
| <b>DN</b> | -8.1  | 0.0   | 29.3 | 1.02 | 17.9  |
| <b>EE</b> | -0.8  | 0.0   | 45.0 | 1.21 | 0.0   |
| <b>EF</b> | -4.5  | 0.0   | 19.0 | 1.15 | 28.3  |
| <b>EG</b> | -4.3  | -0.9  | 16.9 | 0.93 | 25.6  |
| <b>EH</b> | -2.6  | 0.0   | 15.4 | 0.92 | 29.0  |
| <b>EI</b> | -3.0  | 0.9   | 17.8 | 0.93 | 27.6  |
| <b>EJ</b> | -4.3  | 0.0   | 16.5 | 1.21 | 44.5  |
| <b>EL</b> | -4.2  | 12.5  | 21.1 | 2.00 | 74.3  |
| <b>FF</b> | -15.1 | 0.0   | 7.3  | 0.64 | 0.0   |
| <b>FG</b> | -12.9 | 0.5   | 9.6  | 0.75 | -2.7  |
| <b>FH</b> | -8.5  | 0.0   | 11.4 | 0.96 | 0.7   |
| <b>FI</b> | -10.2 | -0.5  | 9.1  | 0.75 | -0.7  |
| <b>FJ</b> | -15.4 | 0.0   | 7.1  | 0.65 | 16.2  |
| <b>FL</b> | -14.8 | 9.9   | 12.0 | 1.07 | 45.9  |
| <b>FM</b> | -16.6 | 7.2   | 7.7  | 2.86 | 63.6  |
| <b>FN</b> | -15.8 | 0.0   | 7.1  | 1.30 | 57.9  |
| <b>GG</b> | -10.2 | -0.4  | 12.6 | 0.74 | 0.0   |
| <b>GH</b> | -6.9  | -0.6  | 12.6 | 0.83 | 3.4   |
| <b>GI</b> | -8.9  | 0.0   | 9.9  | 0.74 | 2.0   |
| <b>GJ</b> | -13.5 | 1.1   | 9.1  | 0.93 | 18.9  |
| <b>GL</b> | -13.0 | -13.0 | 1.8  | 1.86 | 48.7  |
| <b>GN</b> | -14.9 | 2.6   | 6.7  | 2.89 | 60.6  |
| <b>HH</b> | -4.1  | 0.0   | 12.9 | 0.83 | 0.0   |
| <b>HI</b> | -5.3  | 0.6   | 13.3 | 0.83 | -1.4  |
| <b>HJ</b> | -8.6  | 0.0   | 10.0 | 1.16 | 15.5  |
| <b>HL</b> | -8.1  | 11.9  | 14.2 | 2.65 | 45.3  |
| <b>II</b> | -6.3  | 0.4   | 13.0 | 0.74 | 0.0   |
| <b>IJ</b> | -10.2 | -1.1  | 8.0  | 0.93 | 16.9  |
| <b>IL</b> | -9.6  | 8.7   | 10.3 | 1.96 | 46.7  |
| <b>IN</b> | -10.2 | -2.6  | 4.1  | 2.89 | 58.7  |
| <b>JJ</b> | -15.7 | 0.0   | 7.1  | 0.54 | 0.0   |
| <b>JL</b> | -14.5 | 9.7   | 12.5 | 0.91 | 29.8  |
| <b>JM</b> | -16.1 | 7.3   | 8.6  | 2.53 | 47.4  |
| <b>JN</b> | -15.3 | 0.0   | 8.2  | 1.10 | 41.8  |
| <b>KK</b> | -13.2 | 0.0   | 13.3 | 0.72 | 0.0   |
| <b>KL</b> | -13.5 | 9.6   | 12.8 | 1.69 | -43.0 |

|           |       |      |      |      |       |
|-----------|-------|------|------|------|-------|
| <b>KM</b> | -14.1 | 7.8  | 13.1 | 1.94 | -25.3 |
| <b>LL</b> | -13.2 | 19.4 | 20.5 | 0.82 | 0.0   |
| <b>LM</b> | -13.6 | 17.2 | 18.2 | 1.26 | 17.7  |
| <b>LN</b> | -13.3 | 10.3 | 17.0 | 0.90 | 12.0  |
| <b>MM</b> | -14.1 | 14.5 | 17.5 | 0.87 | 0.0   |
| <b>MN</b> | -13.9 | 8.1  | 16.2 | 1.20 | -5.7  |
| <b>NN</b> | -12.2 | 0.0  | 19.5 | 1.14 | 0.0   |

**Table S3.** Classification of reactions according to the topological features of the transition region (single minimum, double minimum with positive/negative local maximum, or shoulder-like weakly decoupled double minimum).

| <b>Reaction</b> | <i>Transition region profile</i>    |
|-----------------|-------------------------------------|
| <b>AA</b>       | Single minimum                      |
| <b>AB</b>       | Single minimum                      |
| <b>AD</b>       | Single minimum                      |
| <b>AJ</b>       | Two minima + negative local maximum |
| <b>AK</b>       | Two minima + positive local maximum |
| <b>AL</b>       | Shoulder-like profile               |
| <b>AM</b>       | Two minima + positive local maximum |
| <b>AN</b>       | Single minimum                      |
| <b>BB</b>       | Single minimum                      |
| <b>BD</b>       | Single minimum                      |
| <b>BE</b>       | Two minima + positive local maximum |
| <b>BF</b>       | Two minima + negative local maximum |
| <b>BI</b>       | Two minima + positive local maximum |
| <b>BJ</b>       | Two minima + negative local maximum |
| <b>BK</b>       | Two minima + positive local maximum |
| <b>BL</b>       | Shoulder-like profile               |
| <b>BM</b>       | Two minima + negative local maximum |
| <b>BN</b>       | Single minimum                      |
| <b>CC</b>       | Single minimum                      |
| <b>CD</b>       | Shoulder-like profile               |
| <b>CE</b>       | Single minimum                      |
| <b>CF</b>       | Two minima + negative local maximum |
| <b>CG</b>       | Shoulder-like profile               |
| <b>CH</b>       | Shoulder-like profile               |
| <b>CI</b>       | Shoulder-like profile               |
| <b>CJ</b>       | Two minima + negative local maximum |
| <b>CL</b>       | Two minima + positive local maximum |

|           |                                     |
|-----------|-------------------------------------|
| <b>DD</b> | Single minimum                      |
| <b>DE</b> | Two minima + negative local maximum |
| <b>DF</b> | Single minimum                      |
| <b>DG</b> | Two minima + negative local maximum |
| <b>DH</b> | Two minima + negative local maximum |
| <b>DI</b> | Two minima + negative local maximum |
| <b>DJ</b> | Single minimum                      |
| <b>DK</b> | Two minima + negative local maximum |
| <b>DL</b> | Single minimum                      |
| <b>DM</b> | Single minimum                      |
| <b>DN</b> | Single minimum                      |
| <b>EE</b> | Single minimum                      |
| <b>EF</b> | Two minima + negative local maximum |
| <b>EG</b> | Single minimum                      |
| <b>EH</b> | Single minimum                      |
| <b>EI</b> | Single minimum                      |
| <b>EJ</b> | Two minima + negative local maximum |
| <b>EL</b> | Two minima + positive local maximum |
| <b>FF</b> | Single minimum                      |
| <b>FG</b> | Single minimum                      |
| <b>FH</b> | Two minima + negative local maximum |
| <b>FI</b> | Single minimum                      |
| <b>FJ</b> | Single minimum                      |
| <b>FL</b> | Two minima + negative local maximum |
| <b>FM</b> | Two minima + positive local maximum |
| <b>FN</b> | Two minima + negative local maximum |
| <b>GG</b> | Single minimum                      |
| <b>GH</b> | Single minimum                      |
| <b>GI</b> | Single minimum                      |
| <b>GJ</b> | Two minima + negative local maximum |
| <b>GL</b> | Two minima + positive local maximum |
| <b>GN</b> | Two minima + positive local maximum |
| <b>HH</b> | Single minimum                      |
| <b>HI</b> | Single minimum                      |
| <b>HJ</b> | Two minima + negative local maximum |
| <b>HL</b> | Two minima + positive local maximum |
| <b>II</b> | Single minimum                      |
| <b>IJ</b> | Two minima + negative local maximum |
| <b>IL</b> | Two minima + positive local maximum |
| <b>IN</b> | Two minima + positive local maximum |

|           |                                     |
|-----------|-------------------------------------|
| <b>JJ</b> | Single minimum                      |
| <b>JL</b> | Two minima + negative local maximum |
| <b>JM</b> | Two minima + positive local maximum |
| <b>JN</b> | Two minima + negative local maximum |
| <b>KK</b> | Single minimum                      |
| <b>KL</b> | Two minima + negative local maximum |
| <b>KM</b> | Two minima + positive local maximum |
| <b>LL</b> | Single minimum                      |
| <b>LM</b> | Two minima + positive local maximum |
| <b>LN</b> | Shoulder-like profile               |
| <b>MM</b> | Two minima + negative local maximum |
| <b>MN</b> | Two minima + negative local maximum |
| <b>NN</b> | Two minima + negative local maximum |

**Table S4.** Selected proton-transfer distances (Å) for reactants (R), transition states (TS), and products (P) for each reaction. Reactions are labeled as **AA**, **AB**, **AC**, ..., where the first letter denotes the left monomer and the second letter denotes the right monomer, indicated with a prime (') in atom labels. *Z/Z'* are the proton donors and *X/X'* are the proton acceptors (see Figure 2).  $XH_a\_R$  and  $X'H_b\_R$  are the donor–H distances in the left and right monomers in R, respectively. In the TS,  $XH_a\_TS$  and  $X'H_b\_TS$  are the donor–H distances, while  $H_aX'\_TS$  and  $H_bX\_TS$  are the distances between each transferring proton and the acceptor atom in the opposite monomer. In the products,  $H_aX'\_P$  and  $H_bX\_P$  are the newly formed H–acceptor distances in the right and left monomers, respectively.

| REACTION  | ZH <sub>a</sub> _R | Z'H <sub>b</sub> _R | ZH <sub>a</sub> _TS | H <sub>a</sub> X'_TS | H <sub>b</sub> X_TS | Z'H <sub>b</sub> _TS | H <sub>a</sub> X'_P | H <sub>b</sub> X_P |
|-----------|--------------------|---------------------|---------------------|----------------------|---------------------|----------------------|---------------------|--------------------|
| <b>AA</b> | 0.97               | 0.97                | 1.23                | 1.26                 | 1.26                | 1.23                 | 1.01                | 1.01               |
| <b>AB</b> | 0.97               | 0.97                | 1.22                | 1.27                 | 1.28                | 1.21                 | 1.01                | 1.01               |
| <b>AD</b> | 0.97               | 0.96                | 1.19                | 1.24                 | 1.22                | 1.29                 | 0.96                | 1.01               |
| <b>AJ</b> | 0.97               | 0.97                | 1.06                | 1.44                 | 1.23                | 1.26                 | 0.97                | 1.01               |
| <b>AK</b> | 0.97               | 1.01                | 1.53                | 1.08                 | 1.39                | 1.21                 | 1.01                | 1.01               |
| <b>AL</b> | 0.97               | 1.01                | 1.18                | 1.23                 | 1.19                | 1.41                 | 0.97                | 1.01               |
| <b>AM</b> | 0.97               | 1.01                | 1.43                | 1.11                 | 1.32                | 1.26                 | 1.01                | 1.01               |
| <b>AN</b> | 0.97               | 1.01                | 1.26                | 1.23                 | 1.32                | 1.26                 | 1.01                | 1.01               |
| <b>BB</b> | 0.97               | 0.97                | 1.19                | 1.30                 | 1.30                | 1.20                 | 1.01                | 1.01               |
| <b>BD</b> | 0.97               | 0.96                | 1.18                | 1.26                 | 1.24                | 1.27                 | 0.96                | 1.01               |
| <b>BE</b> | 0.97               | 1.35                | 1.02                | 2.12                 | 1.22                | 1.74                 | 1.35                | 1.01               |
| <b>BF</b> | 0.97               | 0.97                | 1.04                | 1.46                 | 1.20                | 1.30                 | 0.97                | 1.01               |

|           |      |      |      |      |      |      |      |      |
|-----------|------|------|------|------|------|------|------|------|
| <b>BI</b> | 0.97 | 1.35 | 1.00 | 1.61 | 1.38 | 1.59 | 0.97 | 1.01 |
| <b>BJ</b> | 0.97 | 0.97 | 1.07 | 1.41 | 1.19 | 1.32 | 0.97 | 1.01 |
| <b>BK</b> | 0.97 | 1.01 | 1.50 | 1.09 | 1.45 | 1.17 | 1.01 | 1.01 |
| <b>BL</b> | 0.97 | 1.01 | 1.17 | 1.25 | 1.21 | 1.37 | 0.97 | 1.01 |
| <b>BM</b> | 0.97 | 1.01 | 1.42 | 1.12 | 1.36 | 1.23 | 1.01 | 1.01 |
| <b>BN</b> | 0.97 | 1.01 | 1.25 | 1.24 | 1.34 | 1.24 | 1.01 | 1.01 |
| <b>CC</b> | 0.98 | 0.98 | 1.22 | 1.22 | 1.22 | 1.22 | 0.98 | 0.98 |
| <b>CD</b> | 0.98 | 0.96 | 1.37 | 1.11 | 1.37 | 1.11 | 0.96 | 0.98 |
| <b>CE</b> | 0.98 | 1.35 | 1.25 | 1.64 | 1.25 | 1.64 | 1.35 | 0.98 |
| <b>CF</b> | 0.98 | 0.97 | 1.32 | 1.13 | 1.32 | 1.13 | 0.97 | 0.98 |
| <b>CG</b> | 0.98 | 0.97 | 1.38 | 1.54 | 1.30 | 1.14 | 1.35 | 0.98 |
| <b>CH</b> | 0.98 | 1.35 | 1.38 | 1.54 | 1.38 | 1.54 | 1.35 | 0.98 |
| <b>CI</b> | 0.98 | 1.35 | 1.30 | 1.14 | 1.38 | 1.54 | 0.97 | 0.98 |
| <b>CJ</b> | 0.98 | 0.97 | 1.36 | 1.11 | 1.36 | 1.11 | 0.97 | 0.98 |
| <b>CL</b> | 0.98 | 1.01 | 1.24 | 1.27 | 1.60 | 1.02 | 0.97 | 0.98 |
| <b>DD</b> | 0.96 | 0.96 | 1.25 | 1.25 | 1.25 | 1.25 | 0.96 | 0.96 |
| <b>DE</b> | 0.96 | 1.35 | 1.08 | 1.97 | 1.08 | 1.97 | 1.35 | 0.96 |
| <b>DF</b> | 0.96 | 0.97 | 1.15 | 1.31 | 1.15 | 1.31 | 0.97 | 0.96 |
| <b>DG</b> | 0.96 | 0.97 | 1.17 | 1.72 | 1.08 | 1.40 | 1.35 | 0.96 |
| <b>DH</b> | 0.96 | 1.35 | 1.11 | 1.80 | 1.11 | 1.80 | 1.35 | 0.96 |
| <b>DI</b> | 0.96 | 1.35 | 1.08 | 1.40 | 1.17 | 1.72 | 0.97 | 0.96 |
| <b>DJ</b> | 0.96 | 0.97 | 1.17 | 1.27 | 1.17 | 1.27 | 0.97 | 0.96 |
| <b>DK</b> | 0.96 | 1.01 | 1.42 | 1.14 | 1.42 | 1.14 | 1.01 | 0.96 |
| <b>DL</b> | 0.96 | 1.01 | 1.25 | 1.19 | 1.21 | 1.29 | 0.97 | 0.96 |
| <b>DM</b> | 0.96 | 1.01 | 1.35 | 1.19 | 1.29 | 1.23 | 1.01 | 0.96 |
| <b>DN</b> | 0.96 | 1.01 | 1.24 | 1.29 | 1.24 | 1.29 | 1.01 | 0.96 |
| <b>EE</b> | 1.35 | 1.35 | 1.70 | 1.70 | 1.70 | 1.70 | 1.35 | 1.35 |
| <b>EF</b> | 1.35 | 0.97 | 1.76 | 1.15 | 1.76 | 1.15 | 0.97 | 1.35 |
| <b>EG</b> | 1.35 | 0.97 | 1.75 | 1.59 | 1.65 | 1.22 | 1.35 | 1.35 |
| <b>EH</b> | 1.35 | 1.35 | 1.67 | 1.65 | 1.67 | 1.65 | 1.35 | 1.35 |
| <b>EI</b> | 1.35 | 1.35 | 1.65 | 1.22 | 1.75 | 1.59 | 0.97 | 1.35 |
| <b>EJ</b> | 1.35 | 0.97 | 1.80 | 1.12 | 1.80 | 1.12 | 0.97 | 1.35 |
| <b>EL</b> | 1.35 | 1.01 | 2.07 | 1.03 | 1.70 | 1.26 | 0.97 | 1.35 |
| <b>FF</b> | 0.97 | 0.97 | 1.21 | 1.21 | 1.21 | 1.21 | 0.97 | 0.97 |
| <b>FG</b> | 0.97 | 0.97 | 1.22 | 1.65 | 1.13 | 1.29 | 1.35 | 0.97 |
| <b>FH</b> | 0.97 | 1.35 | 1.15 | 1.74 | 1.15 | 1.74 | 1.35 | 0.97 |
| <b>FI</b> | 0.97 | 1.35 | 1.13 | 1.29 | 1.22 | 1.65 | 0.97 | 0.97 |
| <b>FJ</b> | 0.97 | 0.97 | 1.24 | 1.17 | 1.24 | 1.17 | 0.97 | 0.97 |
| <b>FL</b> | 0.97 | 1.01 | 1.45 | 1.06 | 1.24 | 1.26 | 0.97 | 0.97 |
| <b>FM</b> | 0.97 | 1.01 | 1.65 | 1.05 | 1.20 | 1.30 | 1.01 | 0.97 |

|           |      |      |      |      |      |      |      |      |
|-----------|------|------|------|------|------|------|------|------|
| <b>FN</b> | 0.97 | 1.01 | 1.45 | 1.12 | 1.45 | 1.12 | 1.01 | 0.97 |
| <b>GG</b> | 0.97 | 0.97 | 1.28 | 1.59 | 1.59 | 1.28 | 1.35 | 1.35 |
| <b>GH</b> | 0.97 | 1.35 | 1.22 | 1.65 | 1.60 | 1.74 | 1.35 | 1.35 |
| <b>GI</b> | 0.97 | 1.35 | 1.20 | 1.20 | 1.67 | 1.67 | 0.97 | 1.35 |
| <b>GJ</b> | 0.97 | 0.97 | 1.35 | 1.09 | 1.68 | 1.19 | 0.97 | 1.35 |
| <b>GL</b> | 0.97 | 1.01 | 1.57 | 1.02 | 1.57 | 1.40 | 0.97 | 1.35 |
| <b>GN</b> | 0.97 | 1.01 | 1.69 | 1.05 | 1.66 | 1.29 | 1.01 | 1.35 |
| <b>HH</b> | 1.35 | 1.35 | 1.66 | 1.66 | 1.66 | 1.66 | 1.35 | 1.35 |
| <b>HI</b> | 1.35 | 1.35 | 1.65 | 1.22 | 1.74 | 1.60 | 0.97 | 1.35 |
| <b>HJ</b> | 1.35 | 0.97 | 1.80 | 1.12 | 1.80 | 1.12 | 0.97 | 1.35 |
| <b>HL</b> | 1.35 | 1.01 | 2.07 | 1.02 | 1.59 | 1.38 | 0.97 | 1.35 |
| <b>II</b> | 1.35 | 1.35 | 1.59 | 1.28 | 1.28 | 1.59 | 0.97 | 0.97 |
| <b>IJ</b> | 1.35 | 0.97 | 1.68 | 1.19 | 1.35 | 1.09 | 0.97 | 0.97 |
| <b>IL</b> | 1.35 | 1.01 | 2.00 | 1.03 | 1.24 | 1.25 | 0.97 | 0.97 |
| <b>IN</b> | 1.35 | 1.01 | 1.66 | 1.29 | 1.69 | 1.05 | 1.01 | 0.97 |
| <b>JJ</b> | 0.97 | 0.97 | 1.21 | 1.21 | 1.21 | 1.21 | 0.97 | 0.97 |
| <b>JL</b> | 0.97 | 1.01 | 1.40 | 1.08 | 1.24 | 1.25 | 0.97 | 0.97 |
| <b>JM</b> | 0.97 | 1.01 | 1.59 | 1.07 | 1.23 | 1.26 | 1.01 | 0.97 |
| <b>JN</b> | 0.97 | 1.01 | 1.41 | 1.13 | 1.41 | 1.13 | 1.01 | 0.97 |
| <b>KK</b> | 1.01 | 1.01 | 1.29 | 1.29 | 1.29 | 1.29 | 1.01 | 1.01 |
| <b>KL</b> | 1.01 | 1.01 | 1.18 | 1.32 | 1.08 | 1.65 | 0.97 | 1.01 |
| <b>KM</b> | 1.01 | 1.01 | 1.21 | 1.38 | 1.09 | 1.62 | 1.01 | 1.01 |
| <b>LL</b> | 1.01 | 1.01 | 1.38 | 1.13 | 1.13 | 1.38 | 0.97 | 0.97 |
| <b>LM</b> | 1.01 | 1.01 | 1.60 | 1.10 | 1.20 | 1.29 | 1.01 | 0.97 |
| <b>LN</b> | 1.01 | 1.01 | 1.43 | 1.17 | 1.29 | 1.21 | 1.01 | 0.97 |
| <b>MM</b> | 1.01 | 1.01 | 1.31 | 1.27 | 1.17 | 1.44 | 1.01 | 1.01 |
| <b>MN</b> | 1.01 | 1.01 | 1.21 | 1.38 | 1.13 | 1.52 | 1.01 | 1.01 |
| <b>NN</b> | 1.01 | 1.01 | 1.43 | 1.18 | 1.43 | 1.18 | 1.01 | 1.01 |

## Supplementary Figures

**Figure S1.** Comparison of the transition region for the **AD** pair calculated at the B3LYP and M06-2X levels of theory. The M06-2X profile is shown in orange and the B3LYP profile in blue.

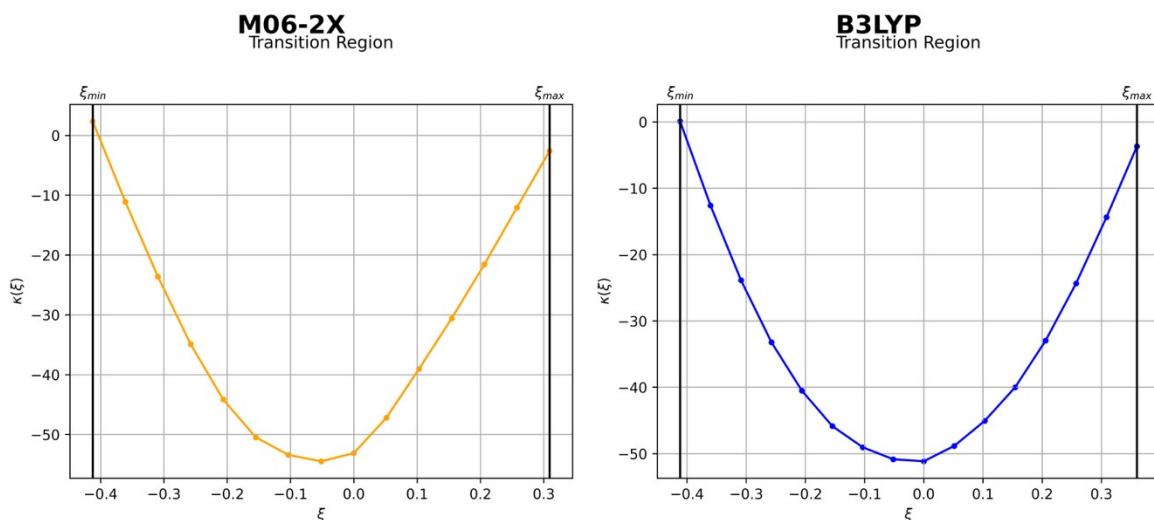

**Figure S2.** Comparison of the transition region for the **BD** pair calculated at the B3LYP and M06-2X levels of theory. The M06-2X profile is shown in orange and the B3LYP profile in blue.

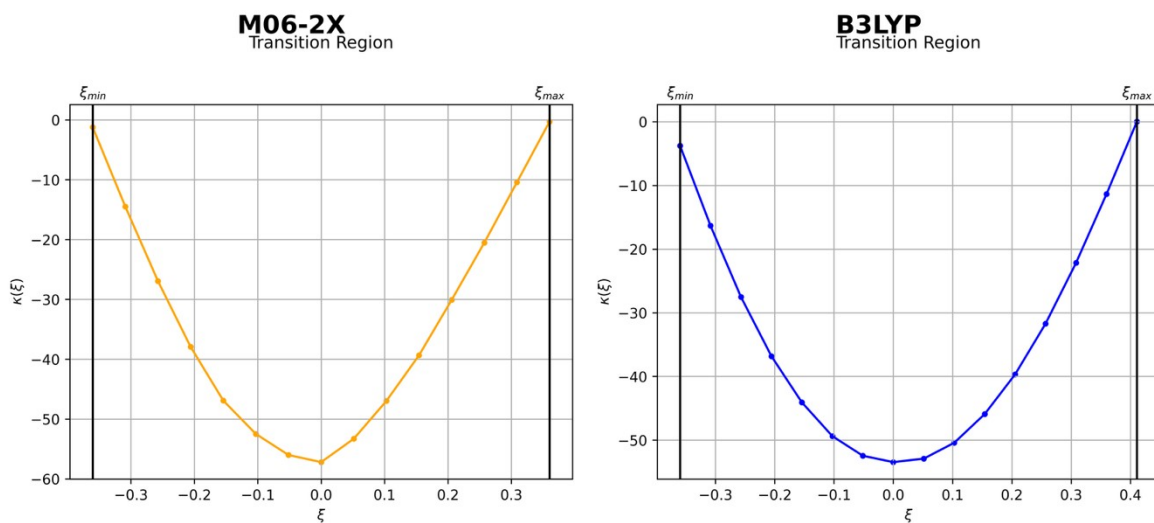

**Figure S3.** Comparison of the transition region for the **DG** pair calculated at the B3LYP and M06-2X levels of theory. The M06-2X profile is shown in orange and the B3LYP profile in blue.

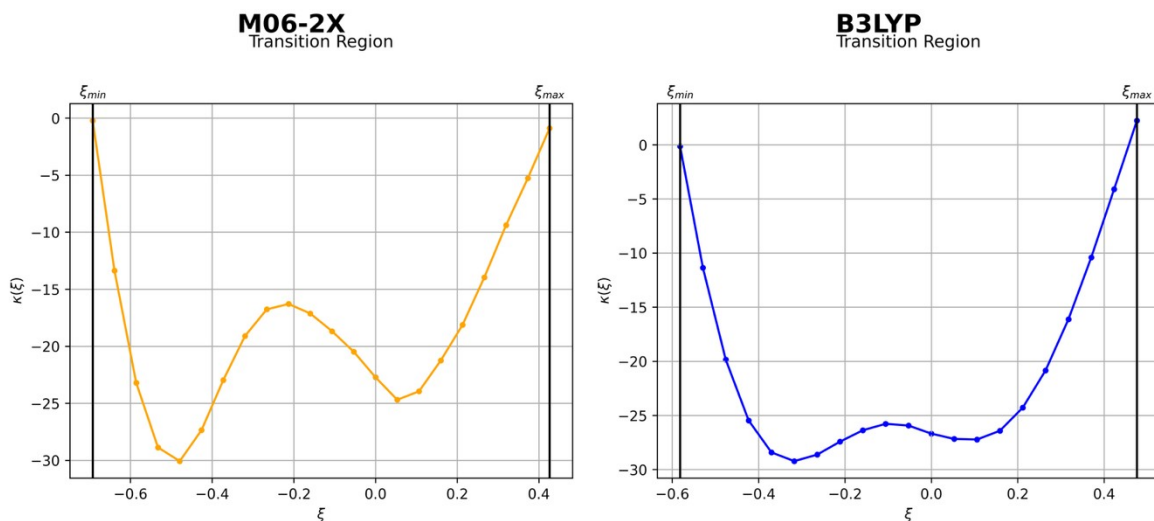

**Figure S4.** Comparison of the transition region for the **DI** pair calculated at the B3LYP and M06-2X levels of theory. The M06-2X profile is shown in orange and the B3LYP profile in blue.

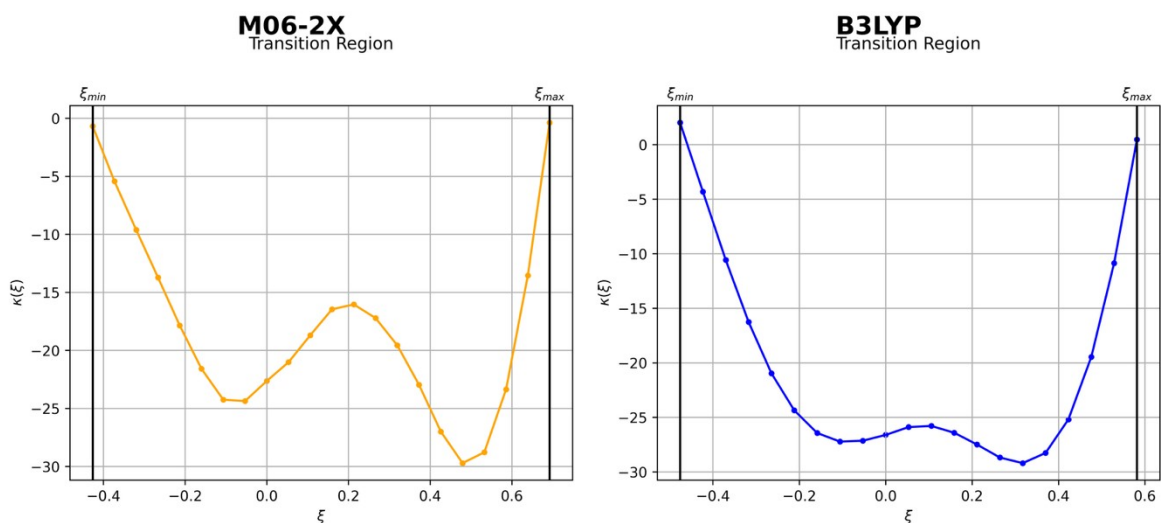

**Figure S5.** Comparison of the transition region for the **DL** pair calculated at the B3LYP and M06-2X levels of theory. The M06-2X profile is shown in orange and the B3LYP profile in blue.

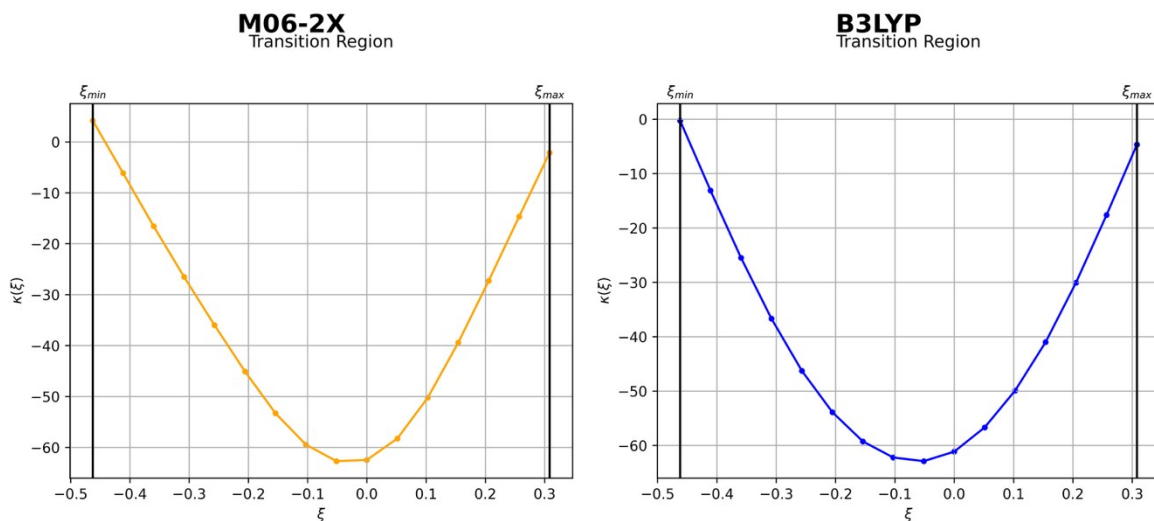

**Figure S6.** Comparison of the transition region for the **DM** pair calculated at the B3LYP and M06-2X levels of theory. The M06-2X profile is shown in orange and the B3LYP profile in blue.

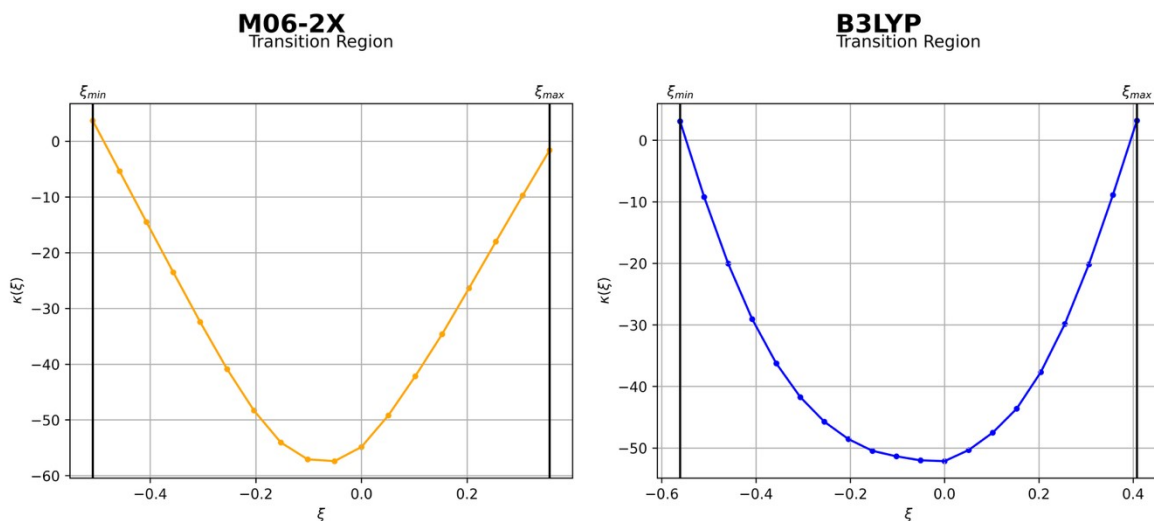

**Figure S7.** Comparison of the transition region for the **EG** pair calculated at the B3LYP and M06-2X levels of theory. The M06-2X profile is shown in orange and the B3LYP profile in blue.

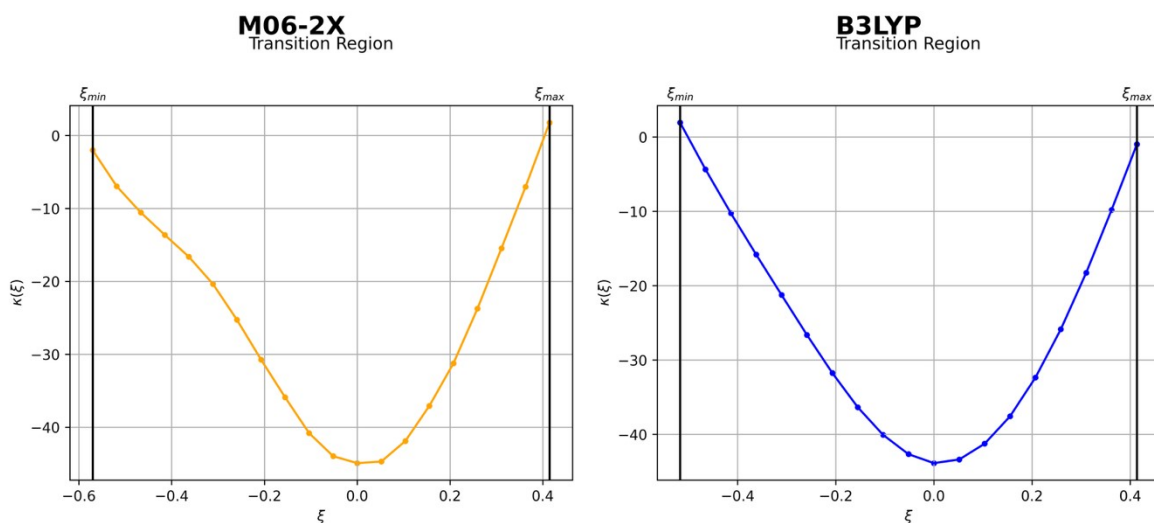

**Figure S8.** Comparison of the transition region for the **EI** pair calculated at the B3LYP and M06-2X levels of theory. The M06-2X profile is shown in orange and the B3LYP profile in blue.

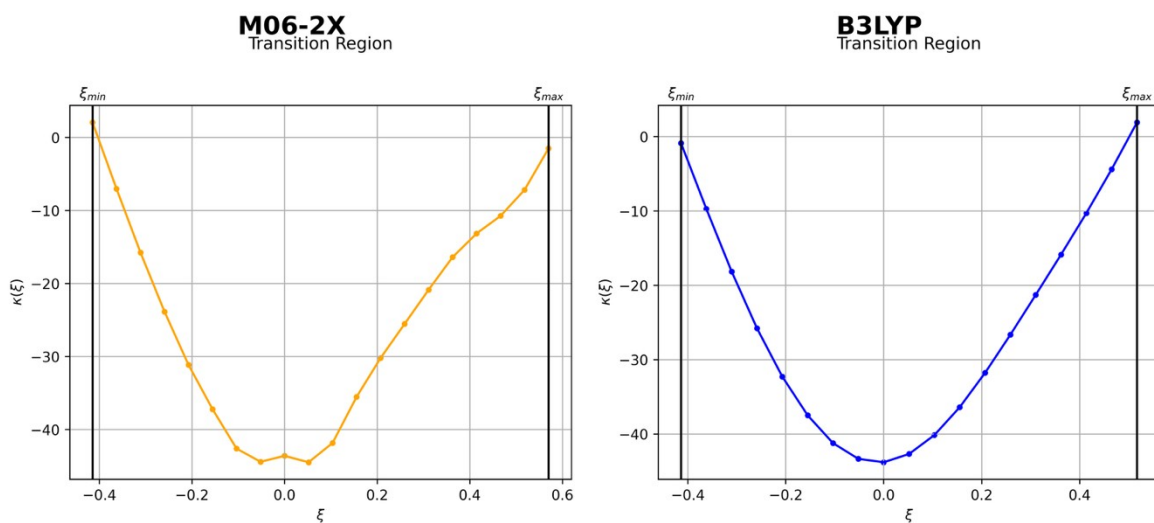

**Figure S9.** Comparison of the transition region for the **EL** pair calculated at the B3LYP and M06-2X levels of theory. The M06-2X profile is shown in orange and the B3LYP profile in blue.

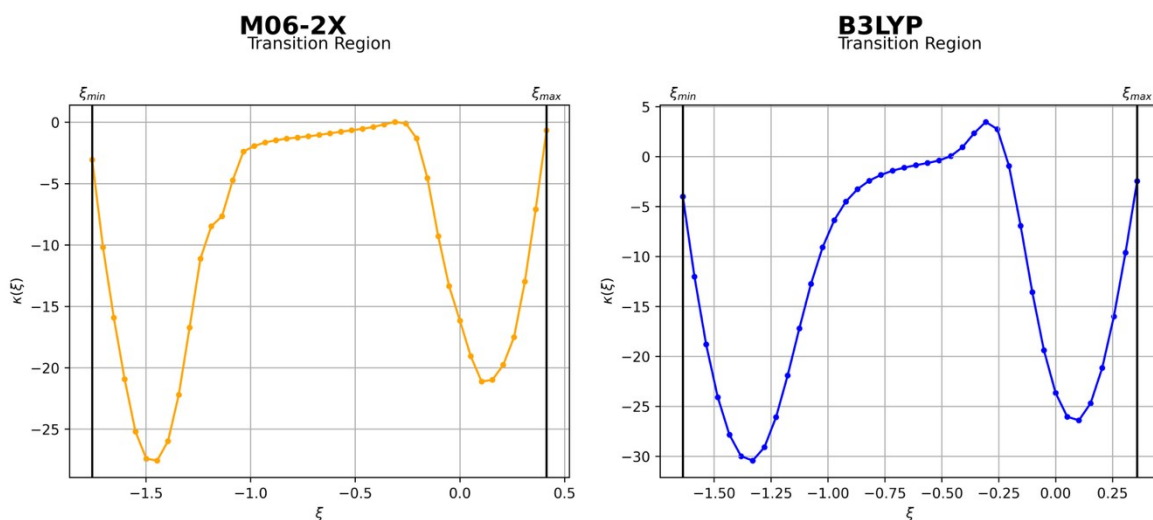

**Figure S10.** Bell–Evans–Polanyi diagram for the subset of double proton transfer reactions proceeding through six-membered transition states, comparing results obtained at the B3LYP and M06-2X levels of theory. Linear regressions are shown for both methods, with B3LYP in blue and M06-2X in orange.

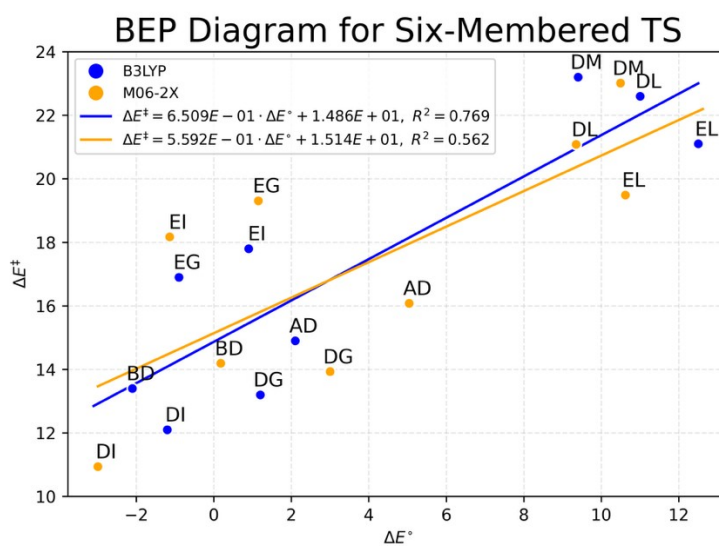

**Figure S11.** Comparison of proton affinity values associated with the neutral-to-anionic process for the monomers, calculated at the B3LYP and M06-2X levels of theory. B3LYP results are shown in blue and M06-2X results in orange.

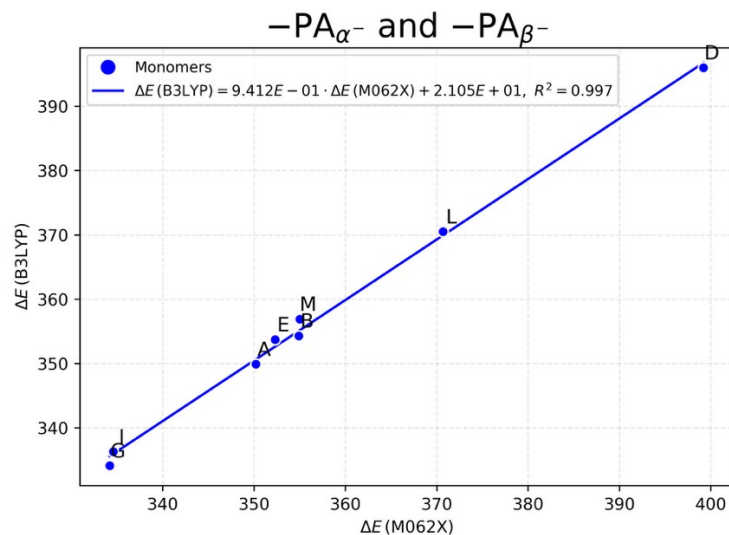

**Figure S12.** Comparison of proton affinity values associated with the cationic-to-neutral process for the monomers, calculated at the B3LYP and M06-2X levels of theory. B3LYP results are shown in blue and M06-2X results in orange.

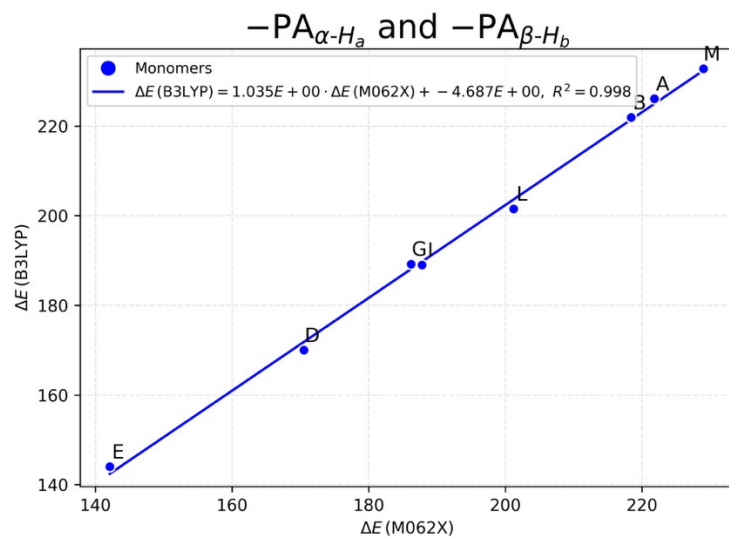

## Transition state coordinates

### AA

|   |          |          |          |
|---|----------|----------|----------|
| C | 6.39092  | 0.92881  | 0.00056  |
| C | 5.14508  | 1.49638  | 0.00044  |
| C | 3.98319  | 0.67503  | 0.00019  |
| C | 4.10914  | -0.75550 | 0.00000  |
| C | 5.42627  | -1.30688 | 0.00014  |
| C | 6.52449  | -0.48824 | 0.00041  |
| H | 2.51386  | 2.27206  | 0.00017  |
| H | 7.27831  | 1.55044  | 0.00077  |
| H | 5.02643  | 2.57495  | 0.00056  |
| C | 2.68554  | 1.19957  | 0.00005  |
| C | 2.94717  | -1.53741 | -0.00027 |
| H | 5.54220  | -2.38504 | 0.00002  |
| H | 7.51789  | -0.92359 | 0.00051  |
| C | 1.68079  | -0.94309 | -0.00037 |
| H | 3.00172  | -2.61861 | -0.00043 |
| C | -1.68080 | 0.94305  | -0.00049 |
| C | -2.94712 | 1.53739  | -0.00035 |
| C | -4.10909 | 0.75547  | -0.00003 |
| C | -3.98317 | -0.67506 | 0.00012  |
| C | -2.68557 | -1.19965 | -0.00008 |
| H | -5.54210 | 2.38505  | 0.00006  |
| H | -3.00165 | 2.61858  | -0.00049 |
| C | -5.42619 | 1.30689  | 0.00016  |
| C | -5.14508 | -1.49640 | 0.00046  |
| H | -2.51376 | -2.27210 | -0.00000 |
| C | -6.39089 | -0.92879 | 0.00064  |
| C | -6.52443 | 0.48828  | 0.00050  |
| H | -5.02647 | -2.57497 | 0.00056  |

|   |          |          |          |
|---|----------|----------|----------|
| H | -7.27830 | -1.55038 | 0.00090  |
| H | -7.51782 | 0.92363  | 0.00066  |
| N | 1.60062  | 0.43691  | -0.00020 |
| N | -1.60069 | -0.43688 | -0.00038 |
| O | -0.58284 | 1.62376  | -0.00069 |
| H | 0.47312  | 0.99636  | -0.00044 |
| O | 0.58283  | -1.62375 | -0.00066 |
| H | -0.47430 | -0.99575 | -0.00053 |

E = -954.590482600

|                                              |             |
|----------------------------------------------|-------------|
| Sum of electronic and zero-point Energies=   | -954.318110 |
| Sum of electronic and thermal Energies=      | -954.301543 |
| Sum of electronic and thermal Enthalpies=    | -954.300598 |
| Sum of electronic and thermal Free Energies= | -954.363908 |

**AB**

|   |          |          |          |
|---|----------|----------|----------|
| C | 5.19789  | 0.80319  | 0.00132  |
| C | 5.33750  | -0.59778 | 0.00078  |
| H | 3.72803  | 2.38403  | 0.00120  |
| C | 3.92173  | 1.31696  | 0.00085  |
| C | 4.22484  | -1.40685 | -0.00016 |
| C | 2.93002  | -0.82315 | -0.00059 |
| H | 4.29423  | -2.48654 | -0.00058 |
| N | 2.82498  | 0.53195  | -0.00009 |
| O | 1.86315  | -1.55010 | -0.00146 |
| H | 0.81160  | -0.95599 | -0.00097 |
| H | 6.05629  | 1.46097  | 0.00207  |
| H | 6.32670  | -1.04296 | 0.00112  |
| C | -0.46126 | 0.96992  | -0.00066 |
| C | -1.74007 | 1.53621  | -0.00053 |

|   |          |          |          |
|---|----------|----------|----------|
| C | -2.88433 | 0.72846  | -0.00010 |
| C | -2.72533 | -0.69846 | 0.00021  |
| C | -1.41532 | -1.19257 | 0.00002  |
| H | -4.35427 | 2.32480  | -0.00017 |
| H | -1.81863 | 2.61594  | -0.00076 |
| C | -4.21362 | 1.24958  | 0.00006  |
| C | -3.86784 | -1.54632 | 0.00066  |
| H | -1.22133 | -2.26147 | 0.00019  |
| C | -5.12656 | -1.00763 | 0.00081  |
| C | -5.29280 | 0.40587  | 0.00050  |
| H | -3.72444 | -2.62191 | 0.00089  |
| H | -5.99936 | -1.64959 | 0.00115  |
| H | -6.29597 | 0.81823  | 0.00062  |
| N | -0.34693 | -0.40717 | -0.00040 |
| O | 0.61985  | 1.67948  | -0.00102 |
| H | 1.67775  | 1.08152  | -0.00059 |

E = -800.917768885

Sum of electronic and zero-point Energies= -800.691579  
Sum of electronic and thermal Energies= -800.677731  
Sum of electronic and thermal Enthalpies= -800.676787  
Sum of electronic and thermal Free Energies= -800.733775

**AD**

|   |          |          |          |
|---|----------|----------|----------|
| O | -3.92320 | -0.78984 | -0.07304 |
| H | -2.66459 | -1.05908 | 0.00250  |
| H | -4.48052 | -1.04564 | 0.66781  |
| C | -1.53962 | 0.71094  | -0.00415 |
| C | -0.32919 | 1.40450  | 0.00248  |
| C | 0.88785  | 0.70854  | 0.00330  |

|   |          |          |          |
|---|----------|----------|----------|
| C | 0.87506  | -0.72918 | -0.00206 |
| C | -0.37446 | -1.35984 | -0.00713 |
| H | 2.18835  | 2.44458  | 0.01242  |
| H | -0.35573 | 2.48654  | 0.00383  |
| C | 2.15766  | 1.36078  | 0.00846  |
| C | 2.09895  | -1.45588 | -0.00322 |
| H | -0.45866 | -2.44204 | -0.01384 |
| C | 3.29553  | -0.79171 | 0.00164  |
| C | 3.31689  | 0.63134  | 0.00769  |
| H | 2.06634  | -2.54040 | -0.00846 |
| H | 4.22913  | -1.34134 | 0.00064  |
| H | 4.27269  | 1.14373  | 0.01137  |
| N | -1.50845 | -0.67575 | -0.00592 |
| O | -2.71032 | 1.26751  | -0.00896 |
| H | -3.50170 | 0.38552  | -0.02088 |

E = -553.739700121

|                                              |             |
|----------------------------------------------|-------------|
| Sum of electronic and zero-point Energies=   | -553.581155 |
| Sum of electronic and thermal Energies=      | -553.571946 |
| Sum of electronic and thermal Enthalpies=    | -553.571001 |
| Sum of electronic and thermal Free Energies= | -553.615622 |

### AJ

|   |          |          |          |
|---|----------|----------|----------|
| O | -2.23300 | 1.09183  | 0.00988  |
| C | -2.55796 | -0.11982 | -0.01150 |
| O | -1.72166 | -1.08822 | -0.03351 |
| H | -0.51498 | -0.71088 | -0.02886 |
| C | 1.04176  | 0.88417  | -0.00176 |
| C | 2.43799  | 1.23902  | 0.00119  |
| C | 3.40120  | 0.19459  | -0.02202 |

|   |          |          |          |
|---|----------|----------|----------|
| C | 2.94305  | -1.15797 | -0.04717 |
| C | 1.60653  | -1.40278 | -0.04814 |
| H | 1.19426  | -2.40402 | -0.06661 |
| N | 0.67535  | -0.39834 | -0.02577 |
| O | 0.14871  | 1.83117  | 0.01930  |
| H | -0.85124 | 1.48879  | 0.01476  |
| C | -4.02159 | -0.49334 | -0.00223 |
| H | -4.23167 | -1.17966 | -0.82514 |
| H | -4.24913 | -1.02215 | 0.92710  |
| H | -4.64624 | 0.39444  | -0.08059 |
| H | 3.65068  | -1.97686 | -0.06525 |
| C | 2.85021  | 2.58799  | 0.02629  |
| C | 4.19358  | 2.89655  | 0.02839  |
| C | 5.15645  | 1.86651  | 0.00553  |
| C | 4.77179  | 0.54304  | -0.01917 |
| H | 5.51589  | -0.24554 | -0.03669 |
| H | 6.21060  | 2.12051  | 0.00743  |
| H | 4.51333  | 3.93171  | 0.04763  |
| H | 2.09534  | 3.36332  | 0.04356  |

E = -706.480055133

|                                              |             |
|----------------------------------------------|-------------|
| Sum of electronic and zero-point Energies=   | -706.282295 |
| Sum of electronic and thermal Energies=      | -706.269348 |
| Sum of electronic and thermal Enthalpies=    | -706.268404 |
| Sum of electronic and thermal Free Energies= | -706.324296 |

### AK

|   |          |          |          |
|---|----------|----------|----------|
| C | 4.29723  | -0.68627 | 0.00031  |
| C | 0.75855  | 0.97406  | -0.00006 |
| C | -0.53976 | 1.53122  | 0.00012  |

|   |          |          |          |
|---|----------|----------|----------|
| C | -1.68204 | 0.72880  | 0.00009  |
| C | -1.52838 | -0.70051 | -0.00013 |
| C | -0.21604 | -1.19201 | -0.00025 |
| H | -3.15548 | 2.32460  | 0.00040  |
| H | -0.62041 | 2.61144  | 0.00026  |
| C | -3.01554 | 1.24895  | 0.00024  |
| C | -2.67234 | -1.54509 | -0.00019 |
| H | -0.04185 | -2.26737 | -0.00039 |
| C | -3.93222 | -1.00766 | -0.00004 |
| C | -4.09552 | 0.40768  | 0.00017  |
| H | -2.53029 | -2.62160 | -0.00036 |
| H | -4.80564 | -1.64905 | -0.00009 |
| H | -5.09821 | 0.82205  | 0.00029  |
| N | 0.85998  | -0.42112 | -0.00021 |
| O | 1.82494  | 1.66400  | -0.00011 |
| H | 3.25096  | 1.10569  | -0.00046 |
| H | 2.12427  | -0.99880 | 0.00002  |
| H | 5.29170  | -1.13316 | 0.00085  |
| N | 3.24206  | -1.46111 | 0.00033  |
| H | 3.42264  | -2.45422 | 0.00106  |
| N | 4.21935  | 0.62875  | -0.00044 |
| H | 5.06944  | 1.16784  | -0.00000 |

E = -627.360182075

Sum of electronic and zero-point Energies= -627.165984  
Sum of electronic and thermal Energies= -627.154129  
Sum of electronic and thermal Enthalpies= -627.153185  
Sum of electronic and thermal Free Energies= -627.204955

**AL**

|   |          |          |          |
|---|----------|----------|----------|
| C | 4.24095  | -0.58770 | -0.00019 |
| C | 0.79046  | 0.92802  | -0.00044 |
| C | -0.48374 | 1.50908  | -0.00024 |
| C | -1.63811 | 0.71920  | 0.00009  |
| C | -1.50473 | -0.71235 | 0.00023  |
| C | -0.20739 | -1.22772 | 0.00003  |
| H | -3.08028 | 2.34093  | 0.00019  |
| H | -0.54485 | 2.58971  | -0.00033 |
| C | -2.95895 | 1.26355  | 0.00030  |
| C | -2.66358 | -1.54043 | 0.00058  |
| H | -0.02486 | -2.29835 | 0.00012  |
| C | -3.91060 | -0.97843 | 0.00077  |
| C | -4.05166 | 0.43913  | 0.00063  |
| H | -2.54026 | -2.61840 | 0.00069  |
| H | -4.79519 | -1.60389 | 0.00104  |
| H | -5.04747 | 0.86863  | 0.00079  |
| N | 0.87120  | -0.45217 | -0.00032 |
| O | 1.87221  | 1.62622  | -0.00076 |
| H | 2.92916  | 1.10227  | -0.00034 |
| H | 1.94569  | -0.95956 | -0.00047 |
| H | 5.28174  | -0.93820 | -0.00014 |
| O | 4.08707  | 0.67519  | 0.00012  |
| N | 3.26399  | -1.45513 | -0.00056 |
| H | 3.57976  | -2.41750 | -0.00083 |

E = -647.240884492

|                                              |             |
|----------------------------------------------|-------------|
| Sum of electronic and zero-point Energies=   | -647.060658 |
| Sum of electronic and thermal Energies=      | -647.049273 |
| Sum of electronic and thermal Enthalpies=    | -647.048329 |
| Sum of electronic and thermal Free Energies= | -647.099122 |

**AM**

|   |          |          |          |
|---|----------|----------|----------|
| C | 4.03099  | 0.85841  | 0.00001  |
| C | 2.74589  | 0.22454  | -0.00001 |
| C | 3.68506  | -1.89725 | 0.00003  |
| C | 4.96675  | -1.35589 | 0.00005  |
| C | 5.15181  | 0.03128  | 0.00004  |
| C | 3.74405  | 2.25836  | -0.00001 |
| C | 2.36972  | 2.36386  | -0.00004 |
| H | 3.50112  | -2.96333 | 0.00003  |
| H | 5.81620  | -2.02600 | 0.00007  |
| H | 6.15436  | 0.44513  | 0.00005  |
| H | 4.45075  | 3.07304  | -0.00001 |
| H | 1.77293  | 3.26434  | -0.00006 |
| N | 1.75010  | 1.12949  | -0.00003 |
| H | 0.54681  | 0.75331  | -0.00004 |
| N | 2.59496  | -1.11183 | 0.00000  |
| C | -0.85455 | -1.13381 | -0.00008 |
| C | -2.17694 | -1.61964 | -0.00007 |
| C | -3.27455 | -0.75526 | -0.00002 |
| C | -3.04211 | 0.66278  | 0.00004  |
| C | -1.70739 | 1.08277  | 0.00003  |
| H | -1.46811 | 2.14423  | 0.00007  |
| N | -0.67642 | 0.24951  | -0.00003 |
| O | 0.17110  | -1.89397 | -0.00013 |
| H | 1.54792  | -1.49326 | -0.00005 |
| C | -4.63282 | -1.20348 | -0.00001 |
| C | -4.13870 | 1.56927  | 0.00010  |
| H | -3.93867 | 2.63618  | 0.00013  |
| C | -5.42462 | 1.09972  | 0.00010  |
| H | -6.26216 | 1.78716  | 0.00014  |

|   |          |          |          |
|---|----------|----------|----------|
| C | -5.66514 | -0.30444 | 0.00005  |
| H | -4.83059 | -2.26983 | -0.00005 |
| H | -6.68889 | -0.66309 | 0.00007  |
| H | -2.31551 | -2.69369 | -0.00012 |

E = -857.254499019

|                                              |             |
|----------------------------------------------|-------------|
| Sum of electronic and zero-point Energies=   | -857.002059 |
| Sum of electronic and thermal Energies=      | -856.987250 |
| Sum of electronic and thermal Enthalpies=    | -856.986306 |
| Sum of electronic and thermal Free Energies= | -857.045373 |

#### AN

|   |          |          |          |
|---|----------|----------|----------|
| C | 4.55634  | 0.61442  | -0.00037 |
| C | 5.03364  | -0.69872 | -0.00034 |
| C | 3.88543  | -1.49296 | 0.00002  |
| H | 6.06029  | -1.02591 | -0.00055 |
| H | 3.78384  | -2.56706 | 0.00019  |
| N | 2.80699  | -0.69622 | 0.00021  |
| H | 1.54909  | -0.68563 | 0.00033  |
| C | 0.09076  | 1.09885  | 0.00021  |
| C | -1.22906 | 1.57108  | 0.00006  |
| C | -2.31441 | 0.68843  | -0.00002 |
| C | -2.05969 | -0.72514 | 0.00007  |
| C | -0.71948 | -1.12782 | 0.00023  |
| H | -3.89006 | 2.18123  | -0.00025 |
| H | -1.38248 | 2.64280  | -0.00002 |
| C | -3.67718 | 1.11793  | -0.00018 |
| C | -3.14287 | -1.64820 | -0.00001 |
| H | -0.46174 | -2.18395 | 0.00030  |
| C | -4.43488 | -1.19623 | -0.00017 |

|   |          |          |          |
|---|----------|----------|----------|
| C | -4.69641 | 0.20359  | -0.00026 |
| H | -2.92762 | -2.71193 | 0.00005  |
| H | -5.26238 | -1.89565 | -0.00023 |
| H | -5.72524 | 0.54700  | -0.00038 |
| N | 0.29666  | -0.27528 | 0.00031  |
| O | 1.11335  | 1.88377  | 0.00028  |
| H | 2.25095  | 1.34062  | 0.00009  |
| N | 3.21837  | 0.58662  | -0.00004 |
| H | 5.09125  | 1.55116  | -0.00060 |

E = -703.558907760

Sum of electronic and zero-point Energies= -703.354944  
Sum of electronic and thermal Energies= -703.342670  
Sum of electronic and thermal Enthalpies= -703.341726  
Sum of electronic and thermal Free Energies= -703.394575

**BB**

|   |          |          |          |
|---|----------|----------|----------|
| C | -3.91106 | -0.95058 | -0.00348 |
| C | -4.12736 | 0.44031  | -0.00185 |
| H | -2.35846 | -2.44882 | -0.00301 |
| C | -2.60819 | -1.39326 | -0.00216 |
| C | -3.06000 | 1.30843  | 0.00080  |
| C | -1.73604 | 0.79513  | 0.00174  |
| H | -3.18756 | 2.38281  | 0.00213  |
| C | 1.73599  | -0.79511 | 0.00197  |
| C | 3.06002  | -1.30849 | 0.00063  |
| C | 4.12746  | -0.44049 | -0.00206 |
| C | 3.91124  | 0.95042  | -0.00352 |
| C | 2.60832  | 1.39311  | -0.00195 |
| H | 3.18751  | -2.38289 | 0.00173  |

|   |          |          |          |
|---|----------|----------|----------|
| H | 2.35889  | 2.44876  | -0.00279 |
| N | -1.55466 | -0.55126 | 0.00045  |
| N | 1.55462  | 0.55137  | 0.00085  |
| O | 0.71152  | -1.58293 | 0.00422  |
| H | -0.35959 | -1.05160 | 0.00250  |
| O | -0.71160 | 1.58316  | 0.00378  |
| H | 0.35751  | 1.05279  | 0.00260  |
| H | 5.13938  | -0.83127 | -0.00312 |
| H | 4.73218  | 1.65445  | -0.00570 |
| H | -4.73198 | -1.65464 | -0.00559 |
| H | -5.13931 | 0.83102  | -0.00268 |

E = -647.244983021

|                                              |             |
|----------------------------------------------|-------------|
| Sum of electronic and zero-point Energies=   | -647.064953 |
| Sum of electronic and thermal Energies=      | -647.053805 |
| Sum of electronic and thermal Enthalpies=    | -647.052860 |
| Sum of electronic and thermal Free Energies= | -647.103539 |

**BD**

|   |          |          |          |
|---|----------|----------|----------|
| O | -2.72895 | -0.64809 | -0.07887 |
| H | -1.51238 | -0.99847 | -0.00446 |
| H | -3.29582 | -0.88194 | 0.66209  |
| C | -0.26470 | 0.67686  | -0.00236 |
| C | 1.00129  | 1.31214  | 0.00986  |
| C | 2.14045  | 0.53901  | 0.01187  |
| C | 2.05558  | -0.86739 | 0.00335  |
| C | 0.80276  | -1.43664 | -0.00681 |
| H | 1.03326  | 2.39340  | 0.01409  |
| H | 0.65390  | -2.51026 | -0.01634 |
| N | -0.31534 | -0.68692 | -0.00723 |

|   |          |          |          |
|---|----------|----------|----------|
| O | -1.38436 | 1.32596  | -0.00864 |
| H | -2.23153 | 0.50877  | -0.02151 |
| H | 2.94089  | -1.48832 | 0.00233  |
| H | 3.11327  | 1.01850  | 0.01902  |

E = -400.066975537

|                                              |             |
|----------------------------------------------|-------------|
| Sum of electronic and zero-point Energies=   | -399.954754 |
| Sum of electronic and thermal Energies=      | -399.948158 |
| Sum of electronic and thermal Enthalpies=    | -399.947214 |
| Sum of electronic and thermal Free Energies= | -399.985581 |

**BE**

|   |          |          |          |
|---|----------|----------|----------|
| H | -1.19425 | -0.68956 | -0.01733 |
| S | -2.89811 | -0.36642 | -0.07439 |
| H | -3.06397 | -0.42912 | 1.26410  |
| C | 0.34198  | 0.80067  | -0.00217 |
| C | 1.69444  | 1.18604  | 0.00855  |
| C | 2.66105  | 0.20105  | 0.01088  |
| C | 2.29855  | -1.15738 | 0.00245  |
| C | 0.95747  | -1.46833 | -0.00835 |
| H | 1.93609  | 2.24030  | 0.01342  |
| H | 0.58593  | -2.48641 | -0.01686 |
| N | 0.01684  | -0.50550 | -0.00844 |
| O | -0.61995 | 1.70168  | -0.00782 |
| H | -1.52546 | 1.24198  | -0.02049 |
| H | 3.04345  | -1.94141 | 0.00237  |
| H | 3.70864  | 0.47970  | 0.01852  |

E = -723.028961399

|                                            |             |
|--------------------------------------------|-------------|
| Sum of electronic and zero-point Energies= | -722.920990 |
|--------------------------------------------|-------------|

Sum of electronic and thermal Energies= -722.913401  
Sum of electronic and thermal Enthalpies= -722.912457  
Sum of electronic and thermal Free Energies= -722.953675

**BF**

|   |          |          |          |
|---|----------|----------|----------|
| O | -2.76215 | 0.81015  | 0.00011  |
| C | -2.98599 | -0.41765 | 0.00005  |
| O | -2.11313 | -1.34245 | -0.00020 |
| H | -0.89704 | -0.87974 | -0.00007 |
| H | -4.03563 | -0.75066 | 0.00024  |
| C | 0.54161  | 0.81340  | -0.00003 |
| C | 1.89494  | 1.21775  | -0.00006 |
| C | 2.88448  | 0.26047  | -0.00000 |
| C | 2.55162  | -1.10658 | 0.00007  |
| C | 1.21926  | -1.44225 | 0.00006  |
| H | 2.11025  | 2.27759  | -0.00012 |
| H | 0.87161  | -2.46847 | 0.00010  |
| N | 0.24597  | -0.50509 | 0.00002  |
| O | -0.40814 | 1.70768  | -0.00003 |
| H | -1.37544 | 1.31503  | 0.00005  |
| H | 3.31106  | -1.87617 | 0.00011  |
| H | 3.92524  | 0.56414  | -0.00001 |

E = -513.462255012

Sum of electronic and zero-point Energies= -513.338218  
Sum of electronic and thermal Energies= -513.329707  
Sum of electronic and thermal Enthalpies= -513.328762  
Sum of electronic and thermal Free Energies= -513.372663

**BI**

|   |          |          |          |
|---|----------|----------|----------|
| H | 0.81922  | -0.75231 | 0.00056  |
| C | 3.01395  | 0.31801  | -0.00061 |
| O | 2.41121  | 1.38952  | -0.00033 |
| H | 4.11491  | 0.32233  | -0.00137 |
| S | 2.32153  | -1.27178 | 0.00005  |
| C | -0.98225 | 0.86840  | 0.00034  |
| C | -2.37037 | 1.11237  | -0.00032 |
| C | -3.23667 | 0.03952  | -0.00060 |
| C | -2.73369 | -1.27164 | -0.00026 |
| C | -1.36570 | -1.43269 | 0.00034  |
| H | -2.71440 | 2.13797  | -0.00057 |
| H | -0.89874 | -2.41261 | 0.00057  |
| N | -0.51376 | -0.38988 | 0.00064  |
| O | -0.15388 | 1.89363  | 0.00066  |
| H | 0.81663  | 1.63348  | 0.00108  |
| H | -4.30698 | 0.21178  | -0.00109 |
| H | -3.38896 | -2.13209 | -0.00047 |

E = -836.404789196

|                                              |             |
|----------------------------------------------|-------------|
| Sum of electronic and zero-point Energies=   | -836.284742 |
| Sum of electronic and thermal Energies=      | -836.275522 |
| Sum of electronic and thermal Enthalpies=    | -836.274577 |
| Sum of electronic and thermal Free Energies= | -836.320934 |

**BJ**

|   |          |          |         |
|---|----------|----------|---------|
| O | -2.21205 | 1.08274  | 0.01168 |
| C | -2.56655 | -0.12499 | 0.01090 |
| O | -1.75757 | -1.11046 | 0.01175 |
| H | -0.48590 | -0.75325 | 0.00655 |

|   |          |          |          |
|---|----------|----------|----------|
| C | 1.05391  | 0.81905  | -0.00078 |
| C | 2.43562  | 1.12183  | -0.00473 |
| C | 3.35263  | 0.09573  | -0.00545 |
| C | 2.92272  | -1.24494 | -0.00200 |
| C | 1.57016  | -1.48402 | 0.00193  |
| H | 2.72769  | 2.16316  | -0.00720 |
| H | 1.14888  | -2.48222 | 0.00486  |
| N | 0.66795  | -0.47832 | 0.00248  |
| O | 0.16886  | 1.76987  | -0.00024 |
| H | -0.84795 | 1.44081  | 0.00476  |
| C | -4.04281 | -0.44835 | -0.01432 |
| H | -4.31101 | -0.77785 | -1.02244 |
| H | -4.25933 | -1.27164 | 0.66793  |
| H | -4.63409 | 0.42961  | 0.24028  |
| H | 3.62523  | -2.06679 | -0.00241 |
| H | 4.41272  | 0.32331  | -0.00853 |

E = -552.797463821

Sum of electronic and zero-point Energies= -552.646438  
Sum of electronic and thermal Energies= -552.636182  
Sum of electronic and thermal Enthalpies= -552.635238  
Sum of electronic and thermal Free Energies= -552.684523

**BK**

|   |          |          |          |
|---|----------|----------|----------|
| C | -3.11266 | 0.43174  | -0.00018 |
| C | 0.57572  | -0.80438 | 0.00018  |
| C | 1.94085  | -1.24271 | -0.00015 |
| C | 2.96631  | -0.32960 | -0.00028 |
| C | 2.68552  | 1.05221  | -0.00012 |
| C | 1.35893  | 1.42438  | 0.00016  |

|   |          |          |          |
|---|----------|----------|----------|
| H | 2.12162  | -2.31022 | -0.00028 |
| H | 1.07785  | 2.47544  | 0.00029  |
| N | 0.33617  | 0.54897  | 0.00032  |
| O | -0.39470 | -1.62715 | 0.00037  |
| H | -1.83642 | -1.21894 | 0.00004  |
| H | -1.03898 | 1.02221  | 0.00017  |
| H | -4.15365 | 0.75479  | -0.00030 |
| N | -2.16399 | 1.33642  | -0.00004 |
| H | -2.45598 | 2.30189  | -0.00001 |
| N | -2.86742 | -0.85990 | -0.00020 |
| H | 3.47092  | 1.79631  | -0.00021 |
| H | 3.99618  | -0.67307 | -0.00053 |
| H | -3.64521 | -1.49949 | -0.00036 |

E = -473.687806206

|                                              |             |
|----------------------------------------------|-------------|
| Sum of electronic and zero-point Energies=   | -473.539554 |
| Sum of electronic and thermal Energies=      | -473.530501 |
| Sum of electronic and thermal Enthalpies=    | -473.529557 |
| Sum of electronic and thermal Free Energies= | -473.574784 |

**BL**

|   |          |          |          |
|---|----------|----------|----------|
| C | -3.04595 | 0.35626  | -0.00022 |
| C | 0.52512  | -0.78054 | 0.00020  |
| C | 1.86936  | -1.24473 | 0.00035  |
| C | 2.90558  | -0.34237 | 0.00033  |
| C | 2.64591  | 1.04347  | 0.00017  |
| C | 1.33256  | 1.44411  | 0.00006  |
| H | 2.03156  | -2.31426 | 0.00044  |
| H | 1.04555  | 2.49015  | -0.00006 |
| N | 0.30965  | 0.56317  | 0.00012  |

|   |          |          |          |
|---|----------|----------|----------|
| O | -0.46144 | -1.60531 | 0.00016  |
| H | -1.55869 | -1.19782 | -0.00043 |
| H | -0.83273 | 0.97400  | -0.00006 |
| H | -4.11608 | 0.60305  | 0.00036  |
| O | -2.76486 | -0.88304 | -0.00088 |
| N | -2.16145 | 1.31892  | -0.00027 |
| H | -2.56626 | 2.24701  | 0.00073  |
| H | 3.44455  | 1.77239  | 0.00013  |
| H | 3.92961  | -0.69961 | 0.00043  |

E = -493.568869414

|                                              |             |
|----------------------------------------------|-------------|
| Sum of electronic and zero-point Energies=   | -493.435026 |
| Sum of electronic and thermal Energies=      | -493.426303 |
| Sum of electronic and thermal Enthalpies=    | -493.425359 |
| Sum of electronic and thermal Free Energies= | -493.469729 |

**BM**

|   |          |          |          |
|---|----------|----------|----------|
| C | -2.90667 | 0.72172  | -0.00009 |
| C | -1.57763 | 0.18741  | 0.00021  |
| C | -2.34954 | -1.99868 | 0.00024  |
| C | -3.66938 | -1.55771 | 0.00009  |
| C | -3.96079 | -0.18912 | -0.00012 |
| C | -2.72833 | 2.13989  | -0.00032 |
| C | -1.36670 | 2.35215  | -0.00012 |
| H | -2.08475 | -3.04769 | 0.00025  |
| H | -4.46469 | -2.29127 | 0.00008  |
| H | -4.99217 | 0.14646  | -0.00032 |
| H | -3.49585 | 2.89748  | -0.00051 |
| H | -0.83943 | 3.29481  | -0.00011 |
| N | -0.65618 | 1.16830  | 0.00024  |

|   |          |          |          |
|---|----------|----------|----------|
| H | 0.54436  | 0.89528  | 0.00003  |
| N | -1.32259 | -1.13258 | 0.00028  |
| C | 2.09641  | -0.88881 | -0.00016 |
| C | 3.46757  | -1.29704 | -0.00023 |
| C | 4.47263  | -0.36135 | -0.00007 |
| C | 4.16200  | 1.01378  | 0.00018  |
| C | 2.83031  | 1.35970  | 0.00023  |
| H | 3.67079  | -2.36020 | -0.00041 |
| H | 2.52008  | 2.40113  | 0.00044  |
| N | 1.82944  | 0.45655  | 0.00001  |
| O | 1.14621  | -1.74118 | -0.00031 |
| H | -0.24295 | -1.43576 | 0.00015  |
| H | 5.50937  | -0.68231 | -0.00013 |
| H | 4.93152  | 1.77395  | 0.00036  |

E = -703.582357022

|                                              |             |
|----------------------------------------------|-------------|
| Sum of electronic and zero-point Energies=   | -703.376297 |
| Sum of electronic and thermal Energies=      | -703.364182 |
| Sum of electronic and thermal Enthalpies=    | -703.363237 |
| Sum of electronic and thermal Free Energies= | -703.415971 |

**BN**

|   |          |          |          |
|---|----------|----------|----------|
| C | 3.22760  | -0.87427 | 0.00040  |
| C | 3.85642  | 0.37368  | -0.00017 |
| C | 2.81017  | 1.29776  | -0.00042 |
| H | 4.91444  | 0.57773  | -0.00032 |
| H | 2.83461  | 2.37632  | -0.00083 |
| N | 1.64651  | 0.63201  | 0.00006  |
| H | 0.41567  | 0.77898  | -0.00008 |
| C | -1.24962 | -0.81233 | -0.00015 |

|   |          |          |          |
|---|----------|----------|----------|
| C | -2.63374 | -1.14459 | -0.00015 |
| C | -3.58009 | -0.14780 | 0.00005  |
| C | -3.18680 | 1.20493  | 0.00020  |
| C | -1.83783 | 1.47447  | 0.00013  |
| H | -2.89972 | -2.19341 | -0.00031 |
| H | -1.46265 | 2.49309  | 0.00016  |
| N | -0.89694 | 0.50800  | -0.00002 |
| O | -0.34339 | -1.72731 | -0.00045 |
| H | 0.84195  | -1.32782 | 0.00077  |
| N | 1.90202  | -0.69060 | 0.00050  |
| H | 3.64914  | -1.86721 | 0.00058  |
| H | -3.91014 | 2.00901  | 0.00034  |
| H | -4.63401 | -0.40513 | 0.00009  |

E = -549.886606765

|                                              |             |
|----------------------------------------------|-------------|
| Sum of electronic and zero-point Energies=   | -549.728794 |
| Sum of electronic and thermal Energies=      | -549.719233 |
| Sum of electronic and thermal Enthalpies=    | -549.718289 |
| Sum of electronic and thermal Free Energies= | -549.764758 |

## CC

|   |          |          |          |
|---|----------|----------|----------|
| N | -1.89090 | -0.00022 | -0.00009 |
| O | -1.22248 | 1.06729  | 0.00031  |
| O | -1.22182 | -1.06758 | -0.00031 |
| H | 0.00027  | -0.99531 | -0.00005 |
| N | 1.89089  | 0.00026  | -0.00027 |
| O | 1.22248  | -1.06728 | 0.00042  |
| O | 1.22184  | 1.06754  | -0.00010 |
| H | -0.00027 | 0.99530  | 0.00005  |

E = -411.521262613

Sum of electronic and zero-point Energies= -411.484312  
Sum of electronic and thermal Energies= -411.478544  
Sum of electronic and thermal Enthalpies= -411.477600  
Sum of electronic and thermal Free Energies= -411.514493

### CD

|   |          |          |          |
|---|----------|----------|----------|
| H | -0.80777 | -0.76082 | -0.03685 |
| O | -1.61911 | -0.00012 | -0.09543 |
| H | -2.19256 | 0.00022  | 0.68260  |
| N | 1.19704  | 0.00003  | 0.02547  |
| O | 0.52394  | -1.07211 | -0.00147 |
| O | 0.52384  | 1.07215  | -0.00150 |
| H | -0.80833 | 0.76102  | -0.03689 |

E = -282.214239874

Sum of electronic and zero-point Energies= -282.172962  
Sum of electronic and thermal Energies= -282.168833  
Sum of electronic and thermal Enthalpies= -282.167889  
Sum of electronic and thermal Free Energies= -282.199539

### CE

|   |          |          |          |
|---|----------|----------|----------|
| H | 0.21896  | -0.85970 | -0.03102 |
| S | 1.61666  | 0.00001  | -0.07979 |
| H | 1.74610  | -0.00026 | 1.26413  |
| N | -1.68506 | 0.00002  | 0.01161  |
| O | -1.01596 | -1.07390 | -0.00045 |
| O | -1.01595 | 1.07388  | -0.00042 |
| H | 0.21908  | 0.85976  | -0.03093 |

E = -605.154670725

Sum of electronic and zero-point Energies= -605.122119  
Sum of electronic and thermal Energies= -605.117383  
Sum of electronic and thermal Enthalpies= -605.116439  
Sum of electronic and thermal Free Energies= -605.150074

### CF

|   |          |          |          |
|---|----------|----------|----------|
| O | 1.21228  | -1.12475 | 0.00148  |
| H | 0.08500  | -1.06387 | -0.00003 |
| C | 1.78449  | 0.00053  | 0.00022  |
| O | 1.21091  | 1.12492  | -0.00194 |
| O | -1.23816 | 1.06827  | 0.00196  |
| H | 0.08303  | 1.06320  | -0.00001 |
| O | -1.23771 | -1.06853 | -0.00164 |
| H | 2.87696  | 0.00102  | 0.00106  |
| N | -1.90437 | -0.00040 | -0.00017 |

E = -395.597218703

Sum of electronic and zero-point Energies= -395.546070  
Sum of electronic and thermal Energies= -395.540329  
Sum of electronic and thermal Enthalpies= -395.539385  
Sum of electronic and thermal Free Energies= -395.576112

### CG

|   |          |          |          |
|---|----------|----------|----------|
| H | 0.03696  | -1.00668 | -0.00002 |
| H | 0.44386  | 1.17243  | 0.00006  |
| C | -1.57391 | 0.76736  | 0.00016  |
| H | -2.57376 | 1.20828  | 0.00045  |

|   |          |          |          |
|---|----------|----------|----------|
| O | 1.40219  | -1.19464 | 0.00036  |
| O | -0.61762 | 1.58777  | 0.00004  |
| S | -1.50054 | -0.92456 | -0.00015 |
| N | 2.21501  | -0.24047 | -0.00019 |
| O | 1.72043  | 0.91912  | -0.00013 |

E = -718.537931037

|                                              |             |
|----------------------------------------------|-------------|
| Sum of electronic and zero-point Energies=   | -718.491984 |
| Sum of electronic and thermal Energies=      | -718.485655 |
| Sum of electronic and thermal Enthalpies=    | -718.484711 |
| Sum of electronic and thermal Free Energies= | -718.523687 |

## CH

|   |          |          |          |
|---|----------|----------|----------|
| H | -0.43023 | 1.14920  | -0.01120 |
| C | 1.74573  | -0.00157 | -0.00057 |
| O | -1.81182 | -1.06634 | 0.05179  |
| H | -0.43370 | -1.14829 | 0.01045  |
| O | -1.80853 | 1.06864  | -0.05313 |
| H | 2.83399  | -0.00281 | -0.00198 |
| N | -2.46918 | 0.00230  | 0.00105  |
| S | 1.05817  | 1.53163  | 0.01908  |
| S | 1.05449  | -1.53309 | -0.01848 |

E = -1041.48815261

|                                              |              |
|----------------------------------------------|--------------|
| Sum of electronic and zero-point Energies=   | -1041.446838 |
| Sum of electronic and thermal Energies=      | -1041.440799 |
| Sum of electronic and thermal Enthalpies=    | -1041.439855 |
| Sum of electronic and thermal Free Energies= | -1041.478003 |

**CI**

|   |          |          |          |
|---|----------|----------|----------|
| H | 0.03833  | -1.00648 | 0.00057  |
| H | 0.44331  | 1.17293  | 0.00012  |
| C | -1.57412 | 0.76702  | 0.00032  |
| H | -2.57408 | 1.20766  | 0.00042  |
| O | 1.40225  | -1.19459 | 0.00143  |
| O | -0.61813 | 1.58788  | 0.00092  |
| S | -1.50005 | -0.92480 | -0.00060 |
| N | 2.21486  | -0.24007 | -0.00034 |
| O | 1.72012  | 0.91933  | -0.00122 |

E = -718.537931049

|                                              |             |
|----------------------------------------------|-------------|
| Sum of electronic and zero-point Energies=   | -718.491983 |
| Sum of electronic and thermal Energies=      | -718.485654 |
| Sum of electronic and thermal Enthalpies=    | -718.484710 |
| Sum of electronic and thermal Free Energies= | -718.523680 |

**CJ**

|   |          |          |          |
|---|----------|----------|----------|
| O | 0.71337  | -1.12102 | 0.01725  |
| H | -0.39245 | -1.05332 | 0.00701  |
| C | 1.31392  | 0.00001  | 0.01620  |
| O | 0.71357  | 1.12117  | 0.01763  |
| O | -1.74756 | 1.06675  | -0.00553 |
| H | -0.39219 | 1.05332  | 0.00706  |
| O | -1.74773 | -1.06678 | -0.00513 |
| N | -2.41600 | 0.00005  | -0.01001 |
| C | 2.80722  | -0.00014 | -0.01516 |
| H | 3.19594  | 0.89952  | 0.45893  |
| H | 3.19589  | -0.89934 | 0.45986  |
| H | 3.12478  | -0.00070 | -1.06275 |

E = -434.937736033

Sum of electronic and zero-point Energies= -434.858770  
Sum of electronic and thermal Energies= -434.851270  
Sum of electronic and thermal Enthalpies= -434.850326  
Sum of electronic and thermal Free Energies= -434.892026

### CL

|   |          |          |          |
|---|----------|----------|----------|
| H | 0.36529  | -1.14304 | 0.00010  |
| H | -0.14423 | 1.05305  | -0.00010 |
| C | 1.85418  | 0.05721  | -0.00004 |
| H | 2.94301  | 0.10547  | -0.00016 |
| N | 1.12019  | 1.11579  | -0.00025 |
| H | 1.61825  | 1.99727  | -0.00057 |
| O | 1.38218  | -1.15105 | 0.00036  |
| O | -1.38852 | 1.04658  | 0.00037  |
| O | -1.23264 | -1.08354 | -0.00042 |
| N | -1.97670 | -0.09465 | 0.00003  |

E = -375.721170917

Sum of electronic and zero-point Energies= -375.656490  
Sum of electronic and thermal Energies= -375.650217  
Sum of electronic and thermal Enthalpies= -375.649273  
Sum of electronic and thermal Free Energies= -375.687084

### DD

|   |          |          |          |
|---|----------|----------|----------|
| O | 1.09063  | -0.08828 | -0.00003 |
| H | -0.00002 | -0.02027 | 0.60464  |
| H | 1.60430  | 0.72655  | 0.00011  |

|   |          |          |          |
|---|----------|----------|----------|
| O | -1.09062 | -0.08829 | 0.00003  |
| H | -0.00012 | -0.02032 | -0.60463 |
| H | -1.60420 | 0.72661  | -0.00014 |

E = -152.849628804

|                                              |             |
|----------------------------------------------|-------------|
| Sum of electronic and zero-point Energies=   | -152.808729 |
| Sum of electronic and thermal Energies=      | -152.805227 |
| Sum of electronic and thermal Enthalpies=    | -152.804283 |
| Sum of electronic and thermal Free Energies= | -152.832013 |

### DE

|   |          |          |          |
|---|----------|----------|----------|
| H | -0.84125 | -0.05595 | 0.69207  |
| H | -0.84149 | -0.05594 | -0.69225 |
| S | 1.00336  | -0.07359 | 0.00000  |
| H | -2.14945 | 0.75694  | 0.00008  |
| H | 1.17279  | 1.26648  | -0.00004 |
| O | -1.67430 | -0.09175 | 0.00001  |

E = -475.821050295

|                                              |             |
|----------------------------------------------|-------------|
| Sum of electronic and zero-point Energies=   | -475.783430 |
| Sum of electronic and thermal Energies=      | -475.779489 |
| Sum of electronic and thermal Enthalpies=    | -475.778545 |
| Sum of electronic and thermal Free Energies= | -475.808381 |

### DF

|   |          |          |          |
|---|----------|----------|----------|
| O | -0.49336 | 1.12031  | 0.00213  |
| H | 0.76724  | 0.78419  | -0.03005 |
| C | -1.08314 | -0.00000 | 0.01391  |
| O | -0.49337 | -1.12031 | 0.00213  |

|   |          |          |          |
|---|----------|----------|----------|
| H | 0.76724  | -0.78419 | -0.03005 |
| H | 2.18752  | -0.00000 | 0.67292  |
| H | -2.17886 | 0.00000  | 0.03846  |
| O | 1.60619  | -0.00000 | -0.09610 |

E = -266.279248028

|                                              |             |
|----------------------------------------------|-------------|
| Sum of electronic and zero-point Energies=   | -266.224972 |
| Sum of electronic and thermal Energies=      | -266.220882 |
| Sum of electronic and thermal Enthalpies=    | -266.219938 |
| Sum of electronic and thermal Free Energies= | -266.251513 |

### DG

|   |          |          |          |
|---|----------|----------|----------|
| H | -0.60394 | -1.05581 | -0.04612 |
| C | 0.62290  | 0.95515  | 0.01556  |
| O | -0.54431 | 1.40774  | -0.00280 |
| H | -1.43271 | 0.32464  | -0.04564 |
| H | -2.19883 | -0.97253 | 0.70843  |
| H | 1.44589  | 1.67864  | 0.04333  |
| O | -1.72495 | -0.71729 | -0.09452 |
| S | 1.07539  | -0.70185 | 0.00158  |

E = -589.230162272

|                                              |             |
|----------------------------------------------|-------------|
| Sum of electronic and zero-point Energies=   | -589.179408 |
| Sum of electronic and thermal Energies=      | -589.174870 |
| Sum of electronic and thermal Enthalpies=    | -589.173926 |
| Sum of electronic and thermal Free Energies= | -589.207129 |

### DH

|   |          |         |          |
|---|----------|---------|----------|
| H | -0.81783 | 1.26533 | -0.05650 |
|---|----------|---------|----------|

|   |          |          |          |
|---|----------|----------|----------|
| C | -0.00018 | -1.09334 | 0.02266  |
| H | 0.81831  | 1.26442  | -0.05679 |
| H | 0.00034  | 2.52867  | 0.72988  |
| H | -0.00026 | -2.18165 | 0.05519  |
| O | 0.00030  | 2.01408  | -0.09090 |
| S | -1.53588 | -0.38826 | -0.00252 |
| S | 1.53576  | -0.38858 | -0.00251 |

E = -912.187552864

|                                              |             |
|----------------------------------------------|-------------|
| Sum of electronic and zero-point Energies=   | -912.139818 |
| Sum of electronic and thermal Energies=      | -912.134904 |
| Sum of electronic and thermal Enthalpies=    | -912.133960 |
| Sum of electronic and thermal Free Energies= | -912.168603 |

## DI

|   |          |          |          |
|---|----------|----------|----------|
| H | 1.43229  | 0.32453  | -0.04525 |
| C | -0.62216 | 0.95545  | 0.01565  |
| H | 0.60352  | -1.05610 | -0.04664 |
| H | 2.19736  | -0.97478 | 0.70830  |
| H | -1.44455 | 1.67959  | 0.04346  |
| O | 1.72408  | -0.71796 | -0.09448 |
| S | -1.07570 | -0.70129 | 0.00155  |
| O | 0.54537  | 1.40730  | -0.00285 |

E = -589.230162197

|                                              |             |
|----------------------------------------------|-------------|
| Sum of electronic and zero-point Energies=   | -589.179408 |
| Sum of electronic and thermal Energies=      | -589.174871 |
| Sum of electronic and thermal Enthalpies=    | -589.173927 |
| Sum of electronic and thermal Free Energies= | -589.207128 |

**DJ**

|   |          |          |          |
|---|----------|----------|----------|
| O | 0.04700  | 1.11561  | 0.00498  |
| H | 1.27240  | 0.78541  | -0.02788 |
| C | -0.56866 | -0.00001 | 0.01414  |
| O | 0.04701  | -1.11562 | 0.00498  |
| H | 1.27243  | -0.78542 | -0.02787 |
| H | 2.71994  | 0.00004  | 0.67168  |
| O | 2.14084  | 0.00001  | -0.09799 |
| C | -2.06971 | 0.00001  | 0.00883  |
| H | -2.40860 | 0.00008  | -1.03165 |
| H | -2.45237 | -0.89867 | 0.49098  |
| H | -2.45241 | 0.89860  | 0.49110  |

E = -305.616744977

|                                              |             |
|----------------------------------------------|-------------|
| Sum of electronic and zero-point Energies=   | -305.535201 |
| Sum of electronic and thermal Energies=      | -305.529417 |
| Sum of electronic and thermal Enthalpies=    | -305.528473 |
| Sum of electronic and thermal Free Energies= | -305.564860 |

**DK**

|   |          |          |          |
|---|----------|----------|----------|
| H | 0.65775  | 0.94929  | 0.00217  |
| C | -1.12841 | -0.00028 | 0.01055  |
| H | 0.65821  | -0.94846 | 0.00210  |
| H | 2.46491  | 0.00017  | 0.51360  |
| H | -2.21687 | -0.00055 | 0.02496  |
| O | 1.71101  | 0.00033  | -0.08137 |
| N | -0.46698 | 1.13756  | 0.00217  |
| N | -0.46628 | -1.13765 | 0.00220  |
| H | -0.97352 | -2.00742 | 0.00707  |

|   |          |         |         |
|---|----------|---------|---------|
| H | -0.97531 | 2.00668 | 0.00723 |
|---|----------|---------|---------|

E = -226.508152715

|                                            |             |
|--------------------------------------------|-------------|
| Sum of electronic and zero-point Energies= | -226.430447 |
|--------------------------------------------|-------------|

|                                         |             |
|-----------------------------------------|-------------|
| Sum of electronic and thermal Energies= | -226.425412 |
|-----------------------------------------|-------------|

|                                           |             |
|-------------------------------------------|-------------|
| Sum of electronic and thermal Enthalpies= | -226.424468 |
|-------------------------------------------|-------------|

|                                              |             |
|----------------------------------------------|-------------|
| Sum of electronic and thermal Free Energies= | -226.457681 |
|----------------------------------------------|-------------|

### **DL**

|   |         |          |         |
|---|---------|----------|---------|
| O | 0.38112 | -1.17831 | 0.00240 |
|---|---------|----------|---------|

|   |          |          |          |
|---|----------|----------|----------|
| H | -0.74095 | -0.77587 | -0.02348 |
|---|----------|----------|----------|

|   |         |          |         |
|---|---------|----------|---------|
| C | 1.09396 | -0.11184 | 0.01256 |
|---|---------|----------|---------|

|   |          |         |          |
|---|----------|---------|----------|
| H | -0.72603 | 0.88636 | -0.01808 |
|---|----------|---------|----------|

|   |          |         |         |
|---|----------|---------|---------|
| H | -2.24785 | 0.10587 | 0.65036 |
|---|----------|---------|---------|

|   |         |          |         |
|---|---------|----------|---------|
| H | 2.17872 | -0.24591 | 0.03025 |
|---|---------|----------|---------|

|   |          |         |          |
|---|----------|---------|----------|
| O | -1.64010 | 0.09085 | -0.09574 |
|---|----------|---------|----------|

|   |         |         |         |
|---|---------|---------|---------|
| N | 0.55234 | 1.07587 | 0.00424 |
|---|---------|---------|---------|

|   |         |         |         |
|---|---------|---------|---------|
| H | 1.17774 | 1.86921 | 0.00272 |
|---|---------|---------|---------|

E = -246.392309978

|                                            |             |
|--------------------------------------------|-------------|
| Sum of electronic and zero-point Energies= | -246.326818 |
|--------------------------------------------|-------------|

|                                         |             |
|-----------------------------------------|-------------|
| Sum of electronic and thermal Energies= | -246.322471 |
|-----------------------------------------|-------------|

|                                           |             |
|-------------------------------------------|-------------|
| Sum of electronic and thermal Enthalpies= | -246.321527 |
|-------------------------------------------|-------------|

|                                              |             |
|----------------------------------------------|-------------|
| Sum of electronic and thermal Free Energies= | -246.353513 |
|----------------------------------------------|-------------|

### **DM**

|   |         |          |          |
|---|---------|----------|----------|
| H | 1.10684 | -1.80108 | -0.00373 |
|---|---------|----------|----------|

|   |          |         |         |
|---|----------|---------|---------|
| C | -0.79493 | 1.01500 | 0.00564 |
|---|----------|---------|---------|

|   |         |         |         |
|---|---------|---------|---------|
| C | 0.23530 | 0.02870 | 0.00394 |
|---|---------|---------|---------|

|   |          |          |          |
|---|----------|----------|----------|
| C | -1.23974 | -1.74047 | -0.00193 |
| C | -2.31450 | -0.85010 | 0.00195  |
| C | -2.10486 | 0.53523  | 0.00516  |
| C | -0.08984 | 2.26098  | 0.00260  |
| C | 1.25601  | 1.94407  | -0.00176 |
| H | -1.38032 | -2.81357 | -0.00829 |
| H | -3.31993 | -1.25071 | -0.00023 |
| H | -2.95420 | 1.20987  | 0.00532  |
| H | -0.51086 | 3.25410  | 0.00222  |
| H | 2.09874  | 2.61934  | -0.00698 |
| N | 1.46271  | 0.58107  | 0.00087  |
| H | 2.27117  | -0.34700 | -0.01177 |
| N | 0.02713  | -1.29854 | -0.00056 |
| O | 2.44627  | -1.62426 | -0.08336 |
| H | 3.00482  | -2.01496 | 0.59460  |

E = -456.400141912

|                                              |             |
|----------------------------------------------|-------------|
| Sum of electronic and zero-point Energies=   | -456.264251 |
| Sum of electronic and thermal Energies=      | -456.256570 |
| Sum of electronic and thermal Enthalpies=    | -456.255626 |
| Sum of electronic and thermal Free Energies= | -456.296464 |

**DN**

|   |          |          |          |
|---|----------|----------|----------|
| C | 1.03205  | -1.10901 | 0.00151  |
| C | 1.88372  | 0.00001  | -0.00981 |
| C | 1.03201  | 1.10901  | 0.00154  |
| N | -0.23511 | 0.67855  | 0.02489  |
| H | -1.52053 | 0.77928  | -0.02245 |
| H | 1.26450  | -2.16244 | -0.00507 |
| H | 2.96150  | 0.00002  | -0.02441 |

|   |          |          |          |
|---|----------|----------|----------|
| H | 1.26446  | 2.16244  | -0.00508 |
| N | -0.23505 | -0.67851 | 0.02495  |
| H | -1.52022 | -0.77960 | -0.02252 |
| O | -2.47603 | -0.00002 | -0.11230 |
| H | -3.03708 | 0.00005  | 0.66958  |

E = -302.690774302

|                                              |             |
|----------------------------------------------|-------------|
| Sum of electronic and zero-point Energies=   | -302.601462 |
| Sum of electronic and thermal Energies=      | -302.596249 |
| Sum of electronic and thermal Enthalpies=    | -302.595305 |
| Sum of electronic and thermal Free Energies= | -302.630228 |

### EE

|   |          |          |          |
|---|----------|----------|----------|
| H | -0.00088 | 0.06600  | -0.74217 |
| H | -0.00094 | 0.06606  | 0.74230  |
| S | -1.52501 | 0.07535  | -0.00012 |
| S | 1.52505  | 0.07541  | 0.00011  |
| H | -1.60336 | -1.27212 | 0.00174  |
| H | 1.60461  | -1.27200 | -0.00171 |

E = -798.774938185

|                                              |             |
|----------------------------------------------|-------------|
| Sum of electronic and zero-point Energies=   | -798.746709 |
| Sum of electronic and thermal Energies=      | -798.742479 |
| Sum of electronic and thermal Enthalpies=    | -798.741534 |
| Sum of electronic and thermal Free Energies= | -798.772890 |

### EF

|   |          |         |          |
|---|----------|---------|----------|
| O | -0.99903 | 1.12422 | 0.00081  |
| H | 0.13315  | 0.92983 | -0.01888 |

|   |          |          |          |
|---|----------|----------|----------|
| C | -1.58183 | 0.00003  | 0.00806  |
| O | -0.99915 | -1.12420 | 0.00083  |
| H | 0.13292  | -0.92965 | -0.01863 |
| H | 1.80924  | 0.00025  | 1.25646  |
| H | -2.67436 | 0.00007  | 0.02131  |
| S | 1.62971  | -0.00005 | -0.08136 |

E = -589.227315399

|                                              |             |
|----------------------------------------------|-------------|
| Sum of electronic and zero-point Energies=   | -589.180095 |
| Sum of electronic and thermal Energies=      | -589.175365 |
| Sum of electronic and thermal Enthalpies=    | -589.174421 |
| Sum of electronic and thermal Free Energies= | -589.208027 |

### EG

|   |          |          |          |
|---|----------|----------|----------|
| H | -0.30070 | -0.90791 | -0.03422 |
| C | 1.32257  | 0.76952  | 0.00832  |
| O | 0.33916  | 1.55573  | -0.00064 |
| H | -0.72558 | 0.95978  | -0.02546 |
| H | -2.03957 | -0.24489 | 1.26230  |
| H | 2.31233  | 1.23378  | 0.02166  |
| S | 1.28491  | -0.93535 | 0.00031  |
| S | -1.90336 | -0.19613 | -0.07963 |

E = -912.178639932

|                                              |             |
|----------------------------------------------|-------------|
| Sum of electronic and zero-point Energies=   | -912.136374 |
| Sum of electronic and thermal Energies=      | -912.131213 |
| Sum of electronic and thermal Enthalpies=    | -912.130269 |
| Sum of electronic and thermal Free Energies= | -912.165410 |

**EH**

|   |          |          |          |
|---|----------|----------|----------|
| H | 0.75192  | 0.98966  | -0.03975 |
| C | -1.49793 | -0.00001 | 0.01068  |
| H | 0.75195  | -0.98964 | -0.03974 |
| H | 2.21299  | 0.00003  | 1.26681  |
| H | -2.58570 | -0.00002 | 0.02593  |
| S | -0.80263 | 1.53711  | -0.00105 |
| S | -0.80260 | -1.53711 | -0.00104 |
| S | 2.09625  | 0.00001  | -0.07774 |

E = -1235.13856096

Sum of electronic and zero-point Energies= -1235.099853

Sum of electronic and thermal Energies= -1235.094248

Sum of electronic and thermal Enthalpies= -1235.093304

Sum of electronic and thermal Free Energies= -1235.129955

**EI**

|   |          |          |          |
|---|----------|----------|----------|
| H | 0.72603  | 0.95960  | -0.02531 |
| C | -1.32249 | 0.76967  | 0.00853  |
| H | 0.30067  | -0.90794 | -0.03454 |
| H | 2.03950  | -0.24556 | 1.26232  |
| H | -2.31226 | 1.23393  | 0.02237  |
| S | -1.28498 | -0.93532 | 0.00024  |
| O | -0.33893 | 1.55573  | -0.00082 |
| S | 1.90325  | -0.19618 | -0.07959 |

E = -912.178639963

Sum of electronic and zero-point Energies= -912.136375

Sum of electronic and thermal Energies= -912.131215

Sum of electronic and thermal Enthalpies= -912.130271

Sum of electronic and thermal Free Energies= -912.165411

**EJ**

|   |          |          |          |
|---|----------|----------|----------|
| O | -0.47458 | 1.12005  | -0.01820 |
| H | 0.62848  | 0.92645  | -0.02141 |
| C | -1.08487 | 0.00002  | -0.01426 |
| O | -0.47461 | -1.12005 | -0.01820 |
| H | 0.62844  | -0.92649 | -0.02142 |
| H | 2.34557  | -0.00000 | 1.26815  |
| C | -2.57686 | 0.00002  | 0.02070  |
| H | -2.96602 | -0.89880 | -0.45527 |
| H | -2.89342 | -0.00113 | 1.06852  |
| H | -2.96610 | 0.89976  | -0.45345 |
| S | 2.17418  | -0.00000 | -0.07078 |

E = -628.568063590

Sum of electronic and zero-point Energies= -628.492829

Sum of electronic and thermal Energies= -628.486364

Sum of electronic and thermal Enthalpies= -628.485420

Sum of electronic and thermal Free Energies= -628.524001

**EL**

|   |          |          |          |
|---|----------|----------|----------|
| O | 1.08865  | -1.17298 | 0.00386  |
| H | 0.06688  | -1.06165 | -0.00903 |
| C | 1.64376  | 0.00323  | 0.00483  |
| H | -0.28055 | 0.89702  | -0.01499 |
| H | -1.90754 | 0.00471  | 1.25338  |
| H | 2.73317  | -0.01734 | 0.00732  |
| N | 0.96525  | 1.09952  | 0.00407  |

|   |          |          |          |
|---|----------|----------|----------|
| S | -1.71379 | -0.00788 | -0.08257 |
| H | 1.48013  | 1.97122  | -0.00385 |

E = -569.350511694

|                                              |             |
|----------------------------------------------|-------------|
| Sum of electronic and zero-point Energies=   | -569.289614 |
| Sum of electronic and thermal Energies=      | -569.284335 |
| Sum of electronic and thermal Enthalpies=    | -569.283391 |
| Sum of electronic and thermal Free Energies= | -569.318107 |

### EM

|   |          |          |          |
|---|----------|----------|----------|
| H | 1.04622  | -1.45132 | -0.00945 |
| C | -1.53282 | 0.68097  | 0.00445  |
| C | -0.19686 | 0.15304  | -0.00107 |
| C | -0.98232 | -2.05445 | -0.00252 |
| C | -2.29311 | -1.60515 | 0.00416  |
| C | -2.58172 | -0.23055 | 0.00727  |
| C | -1.34880 | 2.09859  | 0.00319  |
| C | 0.01460  | 2.30636  | -0.00380 |
| H | -0.71435 | -3.10159 | -0.00668 |
| H | -3.09152 | -2.33484 | 0.00538  |
| H | -3.61384 | 0.10225  | 0.01097  |
| H | -2.11532 | 2.85731  | 0.00550  |
| H | 0.54832  | 3.24521  | -0.00847 |
| N | 0.72449  | 1.11912  | -0.00551 |
| H | 1.94496  | 0.65864  | -0.02267 |
| N | 0.04257  | -1.17600 | -0.00458 |
| H | 3.40320  | -0.42484 | 1.25274  |
| S | 3.17182  | -0.45284 | -0.07668 |

E = -779.367706671

Sum of electronic and zero-point Energies= -779.235003  
Sum of electronic and thermal Energies= -779.226412  
Sum of electronic and thermal Enthalpies= -779.225468  
Sum of electronic and thermal Free Energies= -779.269165

**FF**

|   |          |          |          |
|---|----------|----------|----------|
| O | -1.20874 | 1.12673  | 0.00000  |
| H | 0.00064  | 1.11487  | -0.00000 |
| C | -1.77600 | 0.00036  | 0.00000  |
| O | -1.20976 | -1.12636 | -0.00000 |
| O | 1.20867  | -1.12672 | 0.00000  |
| H | -0.00039 | -1.11483 | -0.00000 |
| C | 1.77599  | -0.00038 | 0.00000  |
| O | 1.20980  | 1.12637  | -0.00000 |
| H | 2.87109  | -0.00101 | 0.00000  |
| H | -2.87111 | 0.00094  | 0.00000  |

E = -379.667895801

Sum of electronic and zero-point Energies= -379.604142  
Sum of electronic and thermal Energies= -379.598407  
Sum of electronic and thermal Enthalpies= -379.597463  
Sum of electronic and thermal Free Energies= -379.634054

**FG**

|   |          |          |          |
|---|----------|----------|----------|
| H | -0.14239 | -1.07938 | 0.00091  |
| H | -0.60824 | 1.19993  | -0.00019 |
| C | 1.57077  | 0.78123  | 0.00065  |
| H | 2.57953  | 1.20998  | 0.00134  |
| O | -1.35163 | -1.25376 | 0.00220  |

|   |          |          |          |
|---|----------|----------|----------|
| O | 0.61964  | 1.59489  | 0.00113  |
| S | 1.50362  | -0.92120 | -0.00099 |
| O | -1.72080 | 0.97620  | -0.00152 |
| C | -2.08681 | -0.23537 | -0.00044 |
| H | -3.16827 | -0.40504 | -0.00191 |

E = -702.609159857

|                                              |             |
|----------------------------------------------|-------------|
| Sum of electronic and zero-point Energies=   | -702.549740 |
| Sum of electronic and thermal Energies=      | -702.543446 |
| Sum of electronic and thermal Enthalpies=    | -702.542501 |
| Sum of electronic and thermal Free Energies= | -702.581086 |

### **FH**

|   |          |          |          |
|---|----------|----------|----------|
| O | 1.79027  | 1.13288  | 0.00001  |
| H | 0.63958  | 1.19436  | -0.00000 |
| C | 2.34380  | 0.00000  | -0.00002 |
| O | 1.79027  | -1.13288 | 0.00003  |
| H | 0.63958  | -1.19436 | 0.00001  |
| C | -1.75346 | -0.00000 | 0.00000  |
| H | -2.84283 | 0.00000  | 0.00001  |
| S | -1.06440 | 1.53539  | 0.00000  |
| S | -1.06440 | -1.53539 | -0.00001 |
| H | 3.43804  | 0.00000  | -0.00010 |

E = -1025.55951933

|                                              |              |
|----------------------------------------------|--------------|
| Sum of electronic and zero-point Energies=   | -1025.503518 |
| Sum of electronic and thermal Energies=      | -1025.496699 |
| Sum of electronic and thermal Enthalpies=    | -1025.495755 |
| Sum of electronic and thermal Free Energies= | -1025.536355 |

**FI**

|   |          |          |          |
|---|----------|----------|----------|
| H | -0.14213 | -1.07925 | 0.00013  |
| H | -0.60815 | 1.19986  | 0.00004  |
| C | 1.57085  | 0.78101  | 0.00011  |
| H | 2.57972  | 1.20954  | 0.00017  |
| O | -1.35234 | -1.25378 | 0.00040  |
| O | 0.61989  | 1.59473  | 0.00025  |
| S | 1.50350  | -0.92133 | -0.00018 |
| O | -1.72015 | 0.97642  | -0.00034 |
| C | -2.08689 | -0.23501 | -0.00005 |
| H | -3.16839 | -0.40391 | -0.00022 |

E = -702.609159663

Sum of electronic and zero-point Energies= -702.549736

Sum of electronic and thermal Energies= -702.543440

Sum of electronic and thermal Enthalpies= -702.542496

Sum of electronic and thermal Free Energies= -702.581088

**FJ**

|   |          |          |          |
|---|----------|----------|----------|
| O | 0.70655  | -1.12290 | 0.01687  |
| H | -0.46752 | -1.10389 | 0.00581  |
| C | 1.29934  | -0.00003 | 0.01600  |
| O | 0.70652  | 1.12277  | 0.01621  |
| O | -1.71229 | 1.12514  | -0.00458 |
| H | -0.46782 | 1.10385  | 0.00576  |
| O | -1.71220 | -1.12509 | -0.00525 |
| C | 2.79909  | 0.00007  | -0.01443 |
| H | 3.18905  | -0.89925 | 0.45974  |
| H | 3.11931  | 0.00144  | -1.06095 |

|   |          |          |          |
|---|----------|----------|----------|
| H | 3.18879  | 0.89840  | 0.46185  |
| C | -2.28065 | -0.00002 | -0.00862 |
| H | -3.37714 | -0.00002 | -0.01602 |

E = -419.005959598

|                                              |             |
|----------------------------------------------|-------------|
| Sum of electronic and zero-point Energies=   | -418.914826 |
| Sum of electronic and thermal Energies=      | -418.907313 |
| Sum of electronic and thermal Enthalpies=    | -418.906369 |
| Sum of electronic and thermal Free Energies= | -418.947986 |

### FL

|   |          |          |          |
|---|----------|----------|----------|
| H | -0.25954 | -1.14836 | 0.00007  |
| H | 0.11458  | 1.13563  | 0.00004  |
| C | -1.82760 | 0.02374  | -0.00022 |
| H | -2.91876 | 0.03995  | -0.00050 |
| N | -1.14393 | 1.12209  | -0.00037 |
| H | -1.69099 | 1.97348  | -0.00080 |
| O | -1.31537 | -1.15874 | 0.00027  |
| O | 1.34985  | 1.11087  | 0.00033  |
| O | 1.18989  | -1.13587 | -0.00011 |
| C | 1.83350  | -0.06704 | 0.00016  |
| H | 2.93181  | -0.12564 | 0.00024  |

E = -359.787075848

|                                              |             |
|----------------------------------------------|-------------|
| Sum of electronic and zero-point Energies=   | -359.709835 |
| Sum of electronic and thermal Energies=      | -359.703704 |
| Sum of electronic and thermal Enthalpies=    | -359.702760 |
| Sum of electronic and thermal Free Energies= | -359.740129 |

**FM**

|   |          |          |          |
|---|----------|----------|----------|
| H | -0.90382 | -1.38875 | 0.00026  |
| C | 1.77463  | 0.64753  | -0.00000 |
| C | 0.41596  | 0.17830  | 0.00009  |
| C | 1.10859  | -2.05506 | -0.00013 |
| C | 2.43988  | -1.66600 | -0.00024 |
| C | 2.78574  | -0.30680 | -0.00017 |
| C | 1.65839  | 2.07086  | 0.00013  |
| C | 0.30621  | 2.33915  | 0.00028  |
| H | 0.79626  | -3.09011 | -0.00015 |
| H | 3.20544  | -2.43015 | -0.00038 |
| H | 3.83043  | -0.01551 | -0.00023 |
| H | 2.45863  | 2.79365  | 0.00013  |
| H | -0.18244 | 3.30253  | 0.00040  |
| N | -0.46098 | 1.18958  | 0.00029  |
| H | -1.75043 | 1.01163  | -0.00026 |
| N | 0.12062  | -1.13792 | 0.00004  |
| O | -2.93017 | 0.81656  | -0.00094 |
| O | -2.55475 | -1.41122 | 0.00075  |
| C | -3.29094 | -0.41271 | -0.00006 |
| H | -4.38302 | -0.55932 | -0.00005 |

E = -569.804094869

Sum of electronic and zero-point Energies= -569.655033

Sum of electronic and thermal Energies= -569.645515

Sum of electronic and thermal Enthalpies= -569.644571

Sum of electronic and thermal Free Energies= -569.690685

**FN**

|   |         |         |         |
|---|---------|---------|---------|
| C | 1.76998 | 1.10886 | 0.00009 |
|---|---------|---------|---------|

|   |          |          |          |
|---|----------|----------|----------|
| C | 2.61774  | -0.00006 | -0.00008 |
| C | 1.76983  | -1.10887 | -0.00019 |
| N | 0.50633  | -0.67060 | -0.00009 |
| H | -0.53506 | -1.08115 | -0.00011 |
| H | 1.99151  | 2.16378  | 0.00021  |
| H | 3.69466  | -0.00012 | -0.00011 |
| H | 1.99127  | -2.16382 | -0.00033 |
| N | 0.50644  | 0.67067  | 0.00007  |
| O | -1.98231 | -1.12900 | -0.00008 |
| O | -1.98250 | 1.12901  | 0.00020  |
| H | -0.53468 | 1.08150  | 0.00016  |
| C | -2.54605 | -0.00002 | 0.00006  |
| H | -3.64768 | -0.00017 | 0.00007  |

E = -416.107568483

|                                              |             |
|----------------------------------------------|-------------|
| Sum of electronic and zero-point Energies=   | -416.005045 |
| Sum of electronic and thermal Energies=      | -415.998292 |
| Sum of electronic and thermal Enthalpies=    | -415.997348 |
| Sum of electronic and thermal Free Energies= | -416.036825 |

**GG**

|   |          |          |          |
|---|----------|----------|----------|
| H | -0.35899 | -1.16616 | -0.00000 |
| C | 1.83355  | -0.90122 | -0.00000 |
| H | 0.35744  | 1.16618  | -0.00000 |
| C | -1.83324 | 0.90121  | -0.00000 |
| H | -2.80921 | 1.39993  | 0.00000  |
| H | 2.80978  | -1.39952 | -0.00000 |
| O | 0.83152  | -1.65004 | -0.00001 |
| O | -0.83092 | 1.64977  | -0.00001 |
| S | -1.90678 | -0.79979 | 0.00000  |

|   |         |         |         |
|---|---------|---------|---------|
| S | 1.90643 | 0.79990 | 0.00000 |
|---|---------|---------|---------|

E = -1025.54853839

Sum of electronic and zero-point Energies= -1025.494597

Sum of electronic and thermal Energies= -1025.487673

Sum of electronic and thermal Enthalpies= -1025.486728

Sum of electronic and thermal Free Energies= -1025.527712

### **GH**

|   |         |          |          |
|---|---------|----------|----------|
| H | 0.08337 | -1.34385 | -0.18699 |
|---|---------|----------|----------|

|   |          |         |         |
|---|----------|---------|---------|
| C | -2.02939 | 0.17829 | 0.07530 |
|---|----------|---------|---------|

|   |         |         |         |
|---|---------|---------|---------|
| H | 0.44558 | 1.10366 | 0.03010 |
|---|---------|---------|---------|

|   |         |          |          |
|---|---------|----------|----------|
| O | 1.24511 | -1.55136 | -0.50670 |
|---|---------|----------|----------|

|   |          |         |         |
|---|----------|---------|---------|
| H | -3.10329 | 0.30102 | 0.21087 |
|---|----------|---------|---------|

|   |          |          |         |
|---|----------|----------|---------|
| S | -1.50199 | -1.41273 | 0.25092 |
|---|----------|----------|---------|

|   |          |         |          |
|---|----------|---------|----------|
| S | -1.19979 | 1.59339 | -0.27620 |
|---|----------|---------|----------|

|   |         |          |          |
|---|---------|----------|----------|
| C | 2.14693 | -0.73174 | -0.20462 |
|---|---------|----------|----------|

|   |         |          |          |
|---|---------|----------|----------|
| H | 3.17498 | -1.09434 | -0.30880 |
|---|---------|----------|----------|

|   |         |         |         |
|---|---------|---------|---------|
| S | 1.99761 | 0.86716 | 0.34306 |
|---|---------|---------|---------|

E = -1348.50332527

Sum of electronic and zero-point Energies= -1348.452341

Sum of electronic and thermal Energies= -1348.444963

Sum of electronic and thermal Enthalpies= -1348.444019

Sum of electronic and thermal Free Energies= -1348.486167

### **GI**

|   |          |          |         |
|---|----------|----------|---------|
| H | -0.00003 | -1.01048 | 0.00001 |
|---|----------|----------|---------|

|   |          |         |          |
|---|----------|---------|----------|
| H | -0.00006 | 1.43448 | -0.00002 |
|---|----------|---------|----------|

|   |          |          |          |
|---|----------|----------|----------|
| C | -1.99751 | 0.59220  | -0.00001 |
| H | -3.05907 | 0.86063  | -0.00002 |
| O | -1.19657 | 1.56109  | -0.00001 |
| S | -1.67109 | -1.06969 | 0.00001  |
| C | 1.99749  | 0.59224  | 0.00001  |
| H | 3.05904  | 0.86072  | 0.00002  |
| S | 1.67114  | -1.06966 | -0.00001 |
| O | 1.19651  | 1.56110  | 0.00001  |

E = -1025.55429298

Sum of electronic and zero-point Energies= -1025.499294

Sum of electronic and thermal Energies= -1025.492415

Sum of electronic and thermal Enthalpies= -1025.491471

Sum of electronic and thermal Free Energies= -1025.532969

### GJ

|   |          |          |          |
|---|----------|----------|----------|
| O | -1.17847 | 1.13257  | 0.01477  |
| H | -0.09054 | 1.25137  | 0.00713  |
| C | -1.65239 | -0.05337 | 0.01547  |
| O | -0.95975 | -1.10918 | 0.02015  |
| H | 0.23102  | -1.01944 | 0.00962  |
| O | 1.22624  | 1.56552  | -0.00205 |
| C | -3.14520 | -0.18038 | -0.01653 |
| H | -3.47500 | -0.06811 | -1.05394 |
| H | -3.45208 | -1.16016 | 0.34368  |
| H | -3.60384 | 0.61673  | 0.56790  |
| C | 2.11517  | 0.68910  | -0.00683 |
| H | 3.15575  | 1.03738  | -0.01324 |
| S | 1.91407  | -1.00633 | -0.00480 |

E = -741.947846101

Sum of electronic and zero-point Energies= -741.860552  
Sum of electronic and thermal Energies= -741.852436  
Sum of electronic and thermal Enthalpies= -741.851492  
Sum of electronic and thermal Free Energies= -741.895286

### GL

|   |          |          |          |
|---|----------|----------|----------|
| H | -0.90293 | 1.17889  | -0.00018 |
| H | 0.07665  | -1.07465 | 0.00015  |
| C | -2.18495 | -0.27793 | -0.00000 |
| H | -3.25866 | -0.47369 | -0.00000 |
| N | -1.31635 | -1.22599 | 0.00018  |
| H | -1.71664 | -2.15782 | 0.00037  |
| O | -1.90279 | 0.99135  | -0.00020 |
| O | 0.61125  | 1.57654  | 0.00016  |
| C | 1.60343  | 0.84552  | 0.00009  |
| H | 2.60142  | 1.30934  | 0.00020  |
| S | 1.63975  | -0.88430 | -0.00012 |

E = -682.728181319

Sum of electronic and zero-point Energies= -682.654826  
Sum of electronic and thermal Energies= -682.647998  
Sum of electronic and thermal Enthalpies= -682.647054  
Sum of electronic and thermal Free Energies= -682.686869

### GN

|   |         |          |          |
|---|---------|----------|----------|
| C | 2.27936 | 1.02325  | 0.00022  |
| C | 2.98305 | -0.17509 | 0.00025  |
| C | 2.00040 | -1.17419 | -0.00005 |

|   |          |          |          |
|---|----------|----------|----------|
| N | 0.79233  | -0.60645 | -0.00023 |
| H | -0.45643 | -0.94027 | -0.00061 |
| H | 2.61842  | 2.04646  | 0.00039  |
| H | 4.05236  | -0.30389 | 0.00047  |
| H | 2.10100  | -2.24796 | -0.00010 |
| N | 0.97053  | 0.72261  | -0.00012 |
| O | -1.57226 | 1.59226  | 0.00019  |
| H | 0.09473  | 1.29413  | -0.00001 |
| C | -2.40385 | 0.68032  | 0.00038  |
| H | -3.47400 | 0.93995  | 0.00103  |
| S | -2.11574 | -1.02909 | -0.00032 |

E = -739.055259910

|                                              |             |
|----------------------------------------------|-------------|
| Sum of electronic and zero-point Energies=   | -738.957012 |
| Sum of electronic and thermal Energies=      | -738.949369 |
| Sum of electronic and thermal Enthalpies=    | -738.948425 |
| Sum of electronic and thermal Free Energies= | -738.990637 |

## HH

|   |          |          |          |
|---|----------|----------|----------|
| H | 0.00007  | 1.25224  | 0.00003  |
| C | 2.23239  | -0.00007 | -0.00014 |
| H | -0.00007 | -1.25225 | 0.00002  |
| C | -2.23239 | 0.00006  | -0.00013 |
| H | -3.32150 | 0.00013  | -0.00034 |
| H | 3.32151  | -0.00015 | -0.00036 |
| S | -1.52918 | 1.38592  | 0.64152  |
| S | 1.52918  | -1.38592 | 0.64152  |
| S | 1.52920  | 1.38595  | -0.64145 |
| S | -1.52920 | -1.38596 | -0.64145 |

E = -1671.45864416

Sum of electronic and zero-point Energies= -1671.411299

Sum of electronic and thermal Energies= -1671.403399

Sum of electronic and thermal Enthalpies= -1671.402455

Sum of electronic and thermal Free Energies= -1671.445939

## HI

H 0.44571 -1.10372 -0.02975

H 0.08401 1.34383 0.18747

C 2.14699 0.73148 0.20471

H 3.17504 1.09404 0.30894

O 1.24526 1.55115 0.50701

S 1.99753 -0.86723 -0.34331

C -2.02946 -0.17815 -0.07564

H -3.10329 -0.30084 -0.21176

S -1.50178 1.41280 -0.25099

S -1.20005 -1.59324 0.27646

E = -1348.50332526

Sum of electronic and zero-point Energies= -1348.452338

Sum of electronic and thermal Energies= -1348.444961

Sum of electronic and thermal Enthalpies= -1348.444017

Sum of electronic and thermal Free Energies= -1348.486164

## HJ

O 1.34632 -1.12854 0.01991

H 0.23158 -1.16999 0.01118

C 1.92946 0.00001 0.01698

O 1.34631 1.12856 0.02048

|   |          |          |          |
|---|----------|----------|----------|
| H | 0.23159  | 1.17000  | 0.01144  |
| C | 3.42587  | 0.00002  | -0.01990 |
| H | 3.81696  | -0.89927 | 0.45300  |
| H | 3.73824  | 0.00008  | -1.06897 |
| H | 3.81697  | 0.89924  | 0.45314  |
| C | -2.22282 | -0.00002 | -0.00754 |
| H | -3.31247 | -0.00004 | -0.01430 |
| S | -1.52682 | -1.53243 | -0.00320 |
| S | -1.52687 | 1.53242  | -0.00342 |

E = -1064.89887649

Sum of electronic and zero-point Energies= -1064.814430

Sum of electronic and thermal Energies= -1064.805892

Sum of electronic and thermal Enthalpies= -1064.804948

Sum of electronic and thermal Free Energies= -1064.850660

### HL

|   |          |          |          |
|---|----------|----------|----------|
| H | 1.01057  | 1.17930  | -0.00051 |
| H | 0.32901  | -1.24403 | -0.00016 |
| C | 2.45426  | -0.11909 | 0.00017  |
| H | 3.54355  | -0.18451 | 0.00065  |
| N | 1.70756  | -1.16496 | -0.00001 |
| H | 2.22081  | -2.03997 | 0.00041  |
| O | 2.02518  | 1.10884  | -0.00021 |
| C | -1.81704 | 0.11590  | 0.00016  |
| H | -2.90582 | 0.16464  | 0.00045  |
| S | -1.24208 | -1.48765 | -0.00010 |
| S | -1.01891 | 1.57688  | 0.00003  |

E = -1005.68157839

Sum of electronic and zero-point Energies= -1005.610900  
Sum of electronic and thermal Energies= -1005.603590  
Sum of electronic and thermal Enthalpies= -1005.602646  
Sum of electronic and thermal Free Energies= -1005.644463

## **II**

|   |          |          |          |
|---|----------|----------|----------|
| H | 0.35845  | -1.16592 | 0.00005  |
| C | 1.83332  | 0.90134  | 0.00007  |
| O | 0.83094  | 1.64985  | 0.00018  |
| H | -0.35837 | 1.16594  | 0.00004  |
| C | -1.83332 | -0.90134 | 0.00003  |
| O | -0.83095 | -1.64984 | 0.00023  |
| H | -2.80925 | -1.40014 | -0.00004 |
| H | 2.80925  | 1.40015  | 0.00010  |
| S | 1.90665  | -0.79976 | -0.00014 |
| S | -1.90665 | 0.79975  | -0.00012 |

E = -1025.54853851

Sum of electronic and zero-point Energies= -1025.494595  
Sum of electronic and thermal Energies= -1025.487672  
Sum of electronic and thermal Enthalpies= -1025.486728  
Sum of electronic and thermal Free Energies= -1025.527710

## **IJ**

|   |          |          |         |
|---|----------|----------|---------|
| O | -1.17847 | 1.13257  | 0.01477 |
| H | -0.09054 | 1.25137  | 0.00714 |
| C | -1.65239 | -0.05337 | 0.01547 |
| O | -0.95975 | -1.10918 | 0.02015 |
| H | 0.23102  | -1.01944 | 0.00962 |

|   |          |          |          |
|---|----------|----------|----------|
| O | 1.22624  | 1.56552  | -0.00205 |
| C | -3.14520 | -0.18038 | -0.01653 |
| H | -3.47500 | -0.06811 | -1.05394 |
| H | -3.45208 | -1.16016 | 0.34368  |
| H | -3.60384 | 0.61673  | 0.56790  |
| C | 2.11517  | 0.68910  | -0.00683 |
| H | 3.15575  | 1.03738  | -0.01324 |
| S | 1.91407  | -1.00633 | -0.00480 |

E = -741.947846101

|                                              |             |
|----------------------------------------------|-------------|
| Sum of electronic and zero-point Energies=   | -741.860552 |
| Sum of electronic and thermal Energies=      | -741.852436 |
| Sum of electronic and thermal Enthalpies=    | -741.851492 |
| Sum of electronic and thermal Free Energies= | -741.895286 |

## II

|   |          |          |          |
|---|----------|----------|----------|
| H | -0.50308 | -1.15991 | 0.00003  |
| H | -0.39312 | 1.25216  | 0.00005  |
| C | -2.16880 | -0.15466 | -0.00001 |
| H | -3.25335 | -0.26800 | -0.00004 |
| N | -1.61993 | 1.01300  | 0.00001  |
| H | -2.26954 | 1.78990  | -0.00001 |
| O | -1.53075 | -1.27883 | -0.00001 |
| O | 0.79543  | 1.60075  | 0.00003  |
| C | 1.68581  | 0.69907  | -0.00004 |
| H | 2.71682  | 1.07066  | -0.00013 |
| S | 1.48889  | -0.97611 | 0.00001  |

E = -682.733384816

|                                            |             |
|--------------------------------------------|-------------|
| Sum of electronic and zero-point Energies= | -682.658917 |
|--------------------------------------------|-------------|

Sum of electronic and thermal Energies= -682.652250  
Sum of electronic and thermal Enthalpies= -682.651306  
Sum of electronic and thermal Free Energies= -682.690672

**IN**

|   |          |          |          |
|---|----------|----------|----------|
| C | 2.27936  | 1.02325  | 0.00022  |
| C | 2.98305  | -0.17509 | 0.00025  |
| C | 2.00040  | -1.17419 | -0.00005 |
| N | 0.79233  | -0.60645 | -0.00023 |
| H | -0.45643 | -0.94027 | -0.00061 |
| H | 2.61842  | 2.04646  | 0.00039  |
| H | 4.05236  | -0.30389 | 0.00047  |
| H | 2.10100  | -2.24796 | -0.00010 |
| N | 0.97053  | 0.72261  | -0.00012 |
| O | -1.57226 | 1.59226  | 0.00019  |
| H | 0.09473  | 1.29413  | -0.00001 |
| C | -2.40385 | 0.68032  | 0.00038  |
| H | -3.47400 | 0.93995  | 0.00103  |
| S | -2.11574 | -1.02909 | -0.00032 |

E = -739.055259910

Sum of electronic and zero-point Energies= -738.957012  
Sum of electronic and thermal Energies= -738.949369  
Sum of electronic and thermal Enthalpies= -738.948425  
Sum of electronic and thermal Free Energies= -738.990637

**JJ**

|   |          |         |          |
|---|----------|---------|----------|
| O | 1.20695  | 1.12123 | 0.01636  |
| H | -0.00000 | 1.09458 | -0.00000 |

|   |          |          |          |
|---|----------|----------|----------|
| C | 1.80078  | -0.00001 | 0.01793  |
| O | 1.20694  | -1.12125 | 0.01635  |
| C | 3.30290  | -0.00002 | -0.00771 |
| H | 3.62722  | 0.00101  | -1.05293 |
| H | 3.69183  | 0.89818  | 0.46974  |
| H | 3.69190  | -0.89905 | 0.46811  |
| O | -1.20695 | -1.12121 | -0.01635 |
| H | 0.00001  | -1.09457 | 0.00000  |
| C | -1.80079 | 0.00002  | -0.01793 |
| O | -1.20695 | 1.12126  | -0.01636 |
| C | -3.30290 | -0.00001 | 0.00771  |
| H | -3.69189 | 0.89905  | -0.46807 |
| H | -3.69185 | -0.89819 | -0.46978 |
| H | -3.62721 | -0.00108 | 1.05293  |

E = -458.343270711

|                                              |             |
|----------------------------------------------|-------------|
| Sum of electronic and zero-point Energies=   | -458.224919 |
| Sum of electronic and thermal Energies=      | -458.215617 |
| Sum of electronic and thermal Enthalpies=    | -458.214673 |
| Sum of electronic and thermal Free Energies= | -458.261328 |

### JK

|   |          |          |          |
|---|----------|----------|----------|
| H | -0.52722 | -1.13152 | 0.00001  |
| C | -2.40278 | -0.06037 | -0.00000 |
| O | 0.80539  | 1.14128  | -0.00011 |
| H | -0.79900 | 1.23448  | 0.00005  |
| O | 0.82265  | -1.10490 | 0.00009  |
| H | -3.49049 | -0.12087 | -0.00004 |
| N | -1.69541 | -1.15699 | -0.00004 |
| N | -1.85912 | 1.14267  | 0.00008  |

|   |          |          |          |
|---|----------|----------|----------|
| H | -2.20207 | -2.02951 | -0.00021 |
| H | -2.45448 | 1.95383  | 0.00015  |
| C | 1.39812  | 0.03604  | -0.00005 |
| C | 2.91599  | 0.01368  | 0.00001  |
| H | 3.31919  | 1.02520  | -0.00046 |
| H | 3.27169  | -0.52870 | 0.87960  |
| H | 3.27173  | -0.52970 | -0.87892 |

E = -379.246766288

|                                              |             |
|----------------------------------------------|-------------|
| Sum of electronic and zero-point Energies=   | -379.128817 |
| Sum of electronic and thermal Energies=      | -379.120507 |
| Sum of electronic and thermal Enthalpies=    | -379.119563 |
| Sum of electronic and thermal Free Energies= | -379.163708 |

## **JL**

|   |          |          |          |
|---|----------|----------|----------|
| H | -0.69650 | -1.12739 | 0.00329  |
| H | -0.43594 | 1.14539  | 0.00360  |
| C | -2.33104 | -0.02365 | -0.00574 |
| H | -3.42282 | -0.04359 | -0.01037 |
| N | -1.68766 | 1.10100  | -0.00411 |
| H | -2.26307 | 1.93312  | -0.00661 |
| O | -1.77303 | -1.18125 | -0.00248 |
| O | 0.80332  | 1.15227  | 0.01189  |
| O | 0.69864  | -1.08903 | 0.01115  |
| C | 1.34020  | -0.00795 | 0.01139  |
| C | 2.84854  | -0.05416 | -0.01039 |
| H | 3.25647  | 0.67751  | 0.68845  |
| H | 3.20545  | -1.05489 | 0.22591  |
| H | 3.19239  | 0.22144  | -1.01156 |

E = -399.122825585

Sum of electronic and zero-point Energies= -399.018639

Sum of electronic and thermal Energies= -399.010764

Sum of electronic and thermal Enthalpies= -399.009820

Sum of electronic and thermal Free Energies= -399.052592

## JM

|   |          |          |          |
|---|----------|----------|----------|
| H | -0.59752 | -1.27113 | -0.00006 |
| C | 2.24000  | 0.55102  | 0.00002  |
| C | 0.85286  | 0.18046  | -0.00003 |
| C | 1.37315  | -2.09378 | -0.00003 |
| C | 2.73098  | -1.80520 | 0.00003  |
| C | 3.17786  | -0.47636 | 0.00005  |
| C | 2.22732  | 1.97954  | 0.00003  |
| C | 0.89852  | 2.34669  | -0.00002 |
| H | 0.98554  | -3.10319 | -0.00005 |
| H | 3.43735  | -2.62446 | 0.00005  |
| H | 4.24141  | -0.26398 | 0.00009  |
| H | 3.07785  | 2.64242  | 0.00006  |
| H | 0.48027  | 3.34249  | -0.00003 |
| N | 0.05255  | 1.25474  | -0.00006 |
| H | -1.20749 | 1.16036  | -0.00003 |
| N | 0.45635  | -1.10715 | -0.00006 |
| O | -2.42937 | 1.03055  | -0.00000 |
| O | -2.19013 | -1.20625 | -0.00001 |
| C | -2.88853 | -0.16883 | 0.00001  |
| C | -4.39812 | -0.28473 | 0.00005  |
| H | -4.80184 | 0.22328  | -0.87908 |
| H | -4.70442 | -1.32925 | -0.00010 |
| H | -4.80176 | 0.22300  | 0.87938  |

E = -609.138855629

Sum of electronic and zero-point Energies= -608.962697  
Sum of electronic and thermal Energies= -608.951362  
Sum of electronic and thermal Enthalpies= -608.950417  
Sum of electronic and thermal Free Energies= -609.002167

**JN**

|   |          |          |          |
|---|----------|----------|----------|
| C | 2.26803  | 1.10861  | 0.00418  |
| C | 3.11667  | -0.00000 | 0.00861  |
| C | 2.26803  | -1.10861 | 0.00418  |
| N | 1.00413  | -0.67090 | -0.00246 |
| H | -0.05682 | -1.07256 | -0.00734 |
| H | 2.49031  | 2.16346  | 0.00530  |
| H | 4.19367  | 0.00000  | 0.01413  |
| H | 2.49031  | -2.16347 | 0.00529  |
| N | 1.00412  | 0.67090  | -0.00246 |
| O | -1.46733 | -1.12437 | -0.01451 |
| O | -1.46734 | 1.12439  | -0.01452 |
| H | -0.05683 | 1.07256  | -0.00733 |
| C | -2.05563 | 0.00001  | -0.01474 |
| C | -3.56812 | -0.00001 | 0.01650  |
| H | -3.96189 | -0.89779 | -0.45922 |
| H | -3.89123 | -0.00026 | 1.06218  |
| H | -3.96191 | 0.89796  | -0.45883 |

E = -455.442078550

Sum of electronic and zero-point Energies= -455.312895  
Sum of electronic and thermal Energies= -455.304317  
Sum of electronic and thermal Enthalpies= -455.303373

Sum of electronic and thermal Free Energies= -455.348075

**KK**

|   |          |          |          |
|---|----------|----------|----------|
| H | 0.00007  | -1.22609 | 0.00007  |
| C | -1.91384 | -0.00000 | -0.00007 |
| H | 0.00003  | 1.22606  | 0.00010  |
| C | 1.91385  | -0.00000 | -0.00008 |
| H | 3.00975  | 0.00002  | -0.00037 |
| H | -3.00975 | -0.00002 | -0.00028 |
| N | -1.28841 | 1.15911  | 0.00012  |
| N | -1.28840 | -1.15913 | -0.00003 |
| N | 1.28841  | -1.15911 | 0.00015  |
| N | 1.28839  | 1.15913  | 0.00001  |
| H | -1.89587 | -1.96624 | -0.00016 |
| H | 1.89582  | 1.96627  | -0.00027 |
| H | -1.89590 | 1.96621  | 0.00001  |
| H | 1.89588  | -1.96623 | -0.00004 |

E = -300.119895476

Sum of electronic and zero-point Energies= -300.010861

Sum of electronic and thermal Energies= -300.003781

Sum of electronic and thermal Enthalpies= -300.002837

Sum of electronic and thermal Free Energies= -300.042316

**KL**

|   |          |          |          |
|---|----------|----------|----------|
| H | -0.02013 | -1.13688 | -0.00001 |
| H | -0.29097 | 1.27055  | 0.00001  |
| C | 1.92058  | -0.04364 | -0.00002 |
| H | 3.02068  | -0.11758 | -0.00020 |

|   |          |          |          |
|---|----------|----------|----------|
| N | 1.35096  | 1.13048  | -0.00011 |
| H | 2.04239  | 1.87360  | -0.00040 |
| O | 1.30440  | -1.16331 | 0.00025  |
| C | -1.90932 | -0.04139 | 0.00000  |
| H | -2.99797 | -0.10358 | 0.00008  |
| N | -1.36886 | 1.16327  | 0.00011  |
| N | -1.20477 | -1.14054 | -0.00021 |
| H | -1.97680 | 1.96557  | 0.00042  |
| H | -1.72135 | -2.00745 | -0.00027 |

E = -320.016066085

|                                              |             |
|----------------------------------------------|-------------|
| Sum of electronic and zero-point Energies=   | -319.914406 |
| Sum of electronic and thermal Energies=      | -319.907575 |
| Sum of electronic and thermal Enthalpies=    | -319.906631 |
| Sum of electronic and thermal Free Energies= | -319.945532 |

**KM**

|   |          |          |          |
|---|----------|----------|----------|
| H | 1.35937  | -1.23895 | -0.00023 |
| C | -1.88144 | 0.52942  | 0.00024  |
| C | -0.47233 | 0.21295  | -0.00008 |
| C | -0.89901 | -2.05158 | 0.00005  |
| C | -2.27856 | -1.83605 | 0.00036  |
| C | -2.78308 | -0.53312 | 0.00046  |
| C | -1.93094 | 1.95223  | 0.00025  |
| C | -0.60859 | 2.36626  | -0.00006 |
| H | -0.49307 | -3.05819 | -0.00004 |
| H | -2.94519 | -2.68951 | 0.00053  |
| H | -3.85504 | -0.36232 | 0.00072  |
| H | -2.80733 | 2.58236  | 0.00043  |
| H | -0.24820 | 3.38714  | -0.00015 |

|   |          |          |          |
|---|----------|----------|----------|
| N | 0.29113  | 1.32752  | -0.00027 |
| H | 1.90698  | 1.19947  | -0.00056 |
| N | -0.00438 | -1.05218 | -0.00018 |
| C | 3.37822  | -0.30511 | -0.00007 |
| H | 4.45586  | -0.47455 | 0.00036  |
| N | 2.96766  | 0.94835  | -0.00054 |
| N | 2.57288  | -1.33671 | -0.00017 |
| H | 3.66475  | 1.67534  | 0.00015  |
| H | 3.02518  | -2.23961 | 0.00005  |

E = -530.023580907

|                                              |             |
|----------------------------------------------|-------------|
| Sum of electronic and zero-point Energies=   | -529.851323 |
| Sum of electronic and thermal Energies=      | -529.841299 |
| Sum of electronic and thermal Enthalpies=    | -529.840355 |
| Sum of electronic and thermal Free Energies= | -529.887499 |

**KN**

|   |          |          |          |
|---|----------|----------|----------|
| C | -1.85097 | 1.10014  | 0.00031  |
| C | -2.71176 | -0.00105 | 0.00089  |
| C | -1.84905 | -1.10067 | -0.00006 |
| N | -0.57411 | -0.67867 | -0.00122 |
| H | 0.88150  | -1.15403 | -0.00040 |
| H | -2.08613 | 2.15501  | 0.00073  |
| H | -3.79028 | -0.00202 | 0.00181  |
| H | -2.08223 | -2.15599 | -0.00011 |
| N | -0.57525 | 0.68066  | -0.00087 |
| H | 0.88317  | 1.15532  | -0.00068 |
| C | 2.63497  | -0.00029 | 0.00054  |
| H | 3.72361  | -0.00035 | 0.00133  |
| N | 2.00483  | 1.15266  | -0.00022 |

|   |         |          |         |
|---|---------|----------|---------|
| N | 2.00423 | -1.15274 | 0.00034 |
| H | 2.55696 | 1.99581  | 0.00026 |
| H | 2.55638 | -1.99592 | 0.00080 |

E = -376.331142619

|                                              |             |
|----------------------------------------------|-------------|
| Sum of electronic and zero-point Energies=   | -376.204369 |
| Sum of electronic and thermal Energies=      | -376.197104 |
| Sum of electronic and thermal Enthalpies=    | -376.196160 |
| Sum of electronic and thermal Free Energies= | -376.236774 |

## LL

|   |          |          |          |
|---|----------|----------|----------|
| H | -0.20711 | -1.15807 | 0.00006  |
| C | 1.85561  | -0.01108 | 0.00023  |
| H | 0.20689  | 1.15797  | -0.00002 |
| C | -1.85559 | 0.01114  | 0.00002  |
| H | -2.95052 | 0.03099  | -0.00003 |
| H | 2.95055  | -0.03081 | 0.00112  |
| N | 1.17324  | -1.11408 | -0.00089 |
| N | -1.17309 | 1.11405  | -0.00049 |
| H | 1.74784  | -1.94822 | -0.00059 |
| H | -1.74757 | 1.94827  | -0.00084 |
| O | -1.34158 | -1.16746 | 0.00066  |
| O | 1.34142  | 1.16743  | 0.00039  |

E = -339.898045600

|                                              |             |
|----------------------------------------------|-------------|
| Sum of electronic and zero-point Energies=   | -339.809692 |
| Sum of electronic and thermal Energies=      | -339.803451 |
| Sum of electronic and thermal Enthalpies=    | -339.802507 |
| Sum of electronic and thermal Free Energies= | -339.840080 |

**LM**

|   |          |          |          |
|---|----------|----------|----------|
| H | -0.97473 | -1.35778 | 0.00017  |
| C | 1.79856  | 0.62022  | -0.00010 |
| C | 0.43131  | 0.17723  | -0.00009 |
| C | 1.06860  | -2.06119 | -0.00012 |
| C | 2.41180  | -1.70579 | -0.00015 |
| C | 2.78957  | -0.35651 | -0.00014 |
| C | 1.71255  | 2.04534  | -0.00004 |
| C | 0.36539  | 2.34233  | -0.00000 |
| H | 0.73772  | -3.09135 | -0.00012 |
| H | 3.15902  | -2.48822 | -0.00018 |
| H | 3.84064  | -0.08870 | -0.00014 |
| H | 2.52747  | 2.75170  | -0.00003 |
| H | -0.10249 | 3.31606  | 0.00004  |
| N | -0.42394 | 1.21044  | -0.00004 |
| H | -1.70261 | 1.05853  | 0.00001  |
| N | 0.09957  | -1.12803 | -0.00011 |
| O | -2.89555 | 0.89513  | -0.00001 |
| C | -3.32097 | -0.31557 | 0.00016  |
| H | -4.41601 | -0.40776 | -0.00000 |
| N | -2.57592 | -1.38319 | 0.00053  |
| H | -3.14345 | -2.22452 | 0.00051  |

E = -549.909521681

|                                              |             |
|----------------------------------------------|-------------|
| Sum of electronic and zero-point Energies=   | -549.749292 |
| Sum of electronic and thermal Energies=      | -549.739650 |
| Sum of electronic and thermal Enthalpies=    | -549.738706 |
| Sum of electronic and thermal Free Energies= | -549.784981 |

**LN**

|   |          |          |          |
|---|----------|----------|----------|
| C | 1.81524  | 1.10660  | 0.00013  |
| C | 2.63389  | -0.02366 | 0.00058  |
| C | 1.74982  | -1.10561 | -0.00005 |
| N | 0.49602  | -0.63841 | -0.00091 |
| H | -0.64872 | -1.04249 | -0.00058 |
| H | 2.06942  | 2.15472  | 0.00034  |
| H | 3.71080  | -0.05443 | 0.00125  |
| H | 1.94490  | -2.16634 | -0.00000 |
| N | 0.53744  | 0.70549  | -0.00082 |
| O | -1.92756 | -1.18072 | 0.00004  |
| H | -0.55411 | 1.14012  | -0.00042 |
| C | -2.55497 | -0.06909 | 0.00055  |
| H | -3.65034 | -0.14178 | 0.00123  |
| N | -1.98572 | 1.10895  | 0.00028  |
| H | -2.64950 | 1.87435  | 0.00075  |

E = -396.214878572

|                                              |             |
|----------------------------------------------|-------------|
| Sum of electronic and zero-point Energies=   | -396.102554 |
| Sum of electronic and thermal Energies=      | -396.095533 |
| Sum of electronic and thermal Enthalpies=    | -396.094589 |
| Sum of electronic and thermal Free Energies= | -396.134456 |

**MM**

|   |         |          |          |
|---|---------|----------|----------|
| C | 3.29063 | -0.59237 | 0.00003  |
| C | 1.89408 | -0.24149 | -0.00002 |
| C | 2.37916 | 2.01674  | -0.00004 |
| C | 3.74998 | 1.76271  | -0.00001 |
| C | 4.21895 | 0.44648  | 0.00003  |
| C | 3.30877 | -2.01789 | 0.00007  |

|   |          |          |          |
|---|----------|----------|----------|
| C | 1.98314  | -2.40640 | 0.00005  |
| H | 1.99251  | 3.02949  | -0.00006 |
| H | 4.43942  | 2.59729  | -0.00002 |
| H | 5.28550  | 0.24685  | 0.00006  |
| H | 4.17183  | -2.66544 | 0.00012  |
| H | 1.59713  | -3.41686 | 0.00006  |
| N | 1.10881  | -1.34163 | -0.00001 |
| H | -0.33290 | -1.26465 | -0.00006 |
| N | 1.46330  | 1.03596  | -0.00004 |
| C | -3.27994 | 0.60110  | 0.00004  |
| C | -1.89110 | 0.23299  | -0.00005 |
| C | -2.40544 | -2.02634 | -0.00007 |
| C | -3.76959 | -1.75018 | -0.00000 |
| C | -4.22009 | -0.42637 | 0.00006  |
| C | -3.27992 | 2.02849  | 0.00009  |
| C | -1.95337 | 2.40434  | 0.00002  |
| H | -2.02385 | -3.03975 | -0.00012 |
| H | -4.47128 | -2.57398 | 0.00001  |
| H | -5.28367 | -0.21314 | 0.00012  |
| H | -4.13554 | 2.68524  | 0.00015  |
| H | -1.54958 | 3.40682  | 0.00003  |
| N | -1.09679 | 1.32275  | -0.00006 |
| H | 0.21067  | 1.25102  | -0.00006 |
| N | -1.48274 | -1.05047 | -0.00009 |

E = -759.918709771

|                                              |             |
|----------------------------------------------|-------------|
| Sum of electronic and zero-point Energies=   | -759.689528 |
| Sum of electronic and thermal Energies=      | -759.676419 |
| Sum of electronic and thermal Enthalpies=    | -759.675475 |
| Sum of electronic and thermal Free Energies= | -759.730243 |

**MN**

|   |          |          |          |
|---|----------|----------|----------|
| C | 2.45898  | 0.48433  | 0.00007  |
| C | 1.05636  | 0.19513  | -0.00002 |
| C | 1.42153  | -2.09340 | -0.00007 |
| C | 2.79883  | -1.89565 | 0.00006  |
| C | 3.33181  | -0.60110 | 0.00011  |
| C | 2.53591  | 1.91208  | 0.00007  |
| C | 1.23383  | 2.36448  | 0.00000  |
| H | 0.97713  | -3.08010 | -0.00015 |
| H | 3.44993  | -2.75981 | 0.00008  |
| H | 4.40677  | -0.45711 | 0.00018  |
| H | 3.42626  | 2.52067  | 0.00012  |
| H | 0.88002  | 3.38481  | 0.00001  |
| N | 0.32619  | 1.32518  | -0.00003 |
| H | -0.88263 | 1.22106  | -0.00002 |
| N | 0.56520  | -1.05765 | -0.00011 |
| H | -0.56728 | -1.12966 | -0.00018 |
| C | -3.27034 | -1.22477 | 0.00014  |
| C | -4.20624 | -0.18659 | 0.00025  |
| C | -3.42729 | 0.97196  | 0.00001  |
| N | -2.12793 | 0.63565  | -0.00029 |
| H | -3.43147 | -2.29305 | 0.00030  |
| H | -5.28169 | -0.26217 | 0.00054  |
| H | -3.73110 | 2.00846  | 0.00008  |
| N | -2.02721 | -0.71916 | -0.00024 |

E = -606.224489635

Sum of electronic and zero-point Energies= -606.040825

Sum of electronic and thermal Energies= -606.030371

Sum of electronic and thermal Enthalpies= -606.029427

Sum of electronic and thermal Free Energies= -606.078015

NN

|   |          |          |          |
|---|----------|----------|----------|
| C | -2.52061 | 1.10851  | -0.00018 |
| C | -3.37006 | 0.00002  | -0.00010 |
| C | -2.52061 | -1.10848 | 0.00006  |
| N | -1.25468 | -0.67491 | 0.00009  |
| H | -0.13486 | -1.03942 | 0.00015  |
| H | -2.74742 | 2.16267  | -0.00030 |
| H | -4.44709 | 0.00001  | -0.00013 |
| H | -2.74745 | -2.16264 | 0.00022  |
| N | -1.25460 | 0.67488  | -0.00006 |
| C | 2.52942  | -1.10315 | -0.00018 |
| C | 3.38676  | 0.00010  | -0.00027 |
| C | 2.52924  | 1.10320  | 0.00009  |
| N | 1.25562  | 0.68273  | 0.00040  |
| H | -0.13461 | 1.03929  | -0.00022 |
| H | 2.76404  | -2.15733 | -0.00033 |
| H | 4.46471  | 0.00019  | -0.00054 |
| H | 2.76369  | 2.15741  | 0.00019  |
| N | 1.25569  | -0.68290 | 0.00021  |

E = -452.520426589

Sum of electronic and zero-point Energies= -452.384237

Sum of electronic and thermal Energies= -452.376208

Sum of electronic and thermal Enthalpies= -452.375264

Sum of electronic and thermal Free Energies= -452.418207
